# Supplementary material for: Effects of donor and acceptor substituents on the photophysics of 4-ethynyl-2,1,3-benzothiadiazole derivatives
Source: Royal Society of Chemistry journal article supplement (doi:10.1039/d3cp03318j), 2023-01-01
Supplement: d3cp03318j1.pdf [file d3cp03318j1.pdf]

## Supporting Information

### Effect of Donor-Acceptor Substituents on the Photophysics of 4-Ethynyl 2,1,3-benzothiadiazole Derivatives

Asit Kumar Pradhan, Manaswini Ray, Parthasarathy Venkatakrisnan\* and Ashok Kumar Mishra\*

*Department of Chemistry, Indian Institute of Technology Madras, Chennai 600036, Tamil Nadu, India*

#### *Experimental Details.*

**Synthetic Specifications.** All the reagents were used as received without further purification. Tetrahydrofuran (THF) was dried and distilled over sodium-ketyl radical system. Triethylamine (TEA) and *N,N*-Dimethylformamide (DMF) were distilled using potassium hydroxide and calcium hydride, respectively. For reactions, clean oven-dried glasswares were used. The progress of the reactions was monitored by thin layer chromatography (TLC) using Merck silica-gel (60 F<sub>254</sub>) precoated plates (0.25 mm) and the compound spots were seen with the naked eye under a UV lamp (365 or 254 nm). The crude product obtained was then purified by column chromatography using silica gel (100-200 mesh). A mixture of hexane and chloroform was used as the eluent. The melting points of the compounds were measured by the open capillary method and the values were corrected. JASCO FT/IR-4100 spectrometer was used for recording infrared spectra. <sup>1</sup>H (400 MHz) and <sup>13</sup>C (100/125 MHz) NMR spectra were recorded using a Bruker Avance FT-NMR (400 and 500 MHz) spectrometer using CDCl<sub>3</sub> with TMS as the internal reference. The reported <sup>1</sup>H and <sup>13</sup>C NMR spectra were calibrated with the residual proton solvent peak (CDCl<sub>3</sub>,  $\delta = 7.26$  ppm) and residual carbon solvent peak (CDCl<sub>3</sub>,  $\delta = 77.16$  ppm) respectively. High-resolution Q-TOF mass spectrometer was used to obtain the high-resolution mass spectra.

**Photophysical Studies.** For this, all the solvents used were of spectroscopic grade. Stock solutions of 10<sup>-3</sup> M for all compounds were prepared in DCM. Then the experimental samples were prepared by evaporating DCM from the required amount of stock solution by purging nitrogen gas and then adding the desired solvent in it.

**Instrumentation.** UV-visible absorption spectra were recorded with the help of a Shimadzu UV-2600 spectrophotometer using a quartz cuvette (path length 1 cm). The steady-state fluorescence and anisotropy measurements were done using a Horiba Jobin-Yvon FluoroMax-4 fluorescence spectrophotometer with a 150 W xenon lamp as a light source. To maintain the temperature of the fluorimeter cuvette holder, a CORIO CD-300F refrigerated/heating circulator from Julabo was used. Fluorescence lifetime measurements were carried out using a Horiba Jobin Yvon Fluorocube lifetime instrument with time-correlated single photon counting set up in reverse mode. The instrument response function (IRF) was collected using Ludox AS40 colloidal silica solution. The decays were analyzed using IBH DAS6 software. A fit with

$0.99 \leq \chi^2 \leq 1.30$  was considered as a good fit.<sup>1</sup> For multiexponential lifetime decay, the average fluorescence lifetime ( $\tau_{avg}$ ) was calculated by using the following equation:<sup>2</sup>

$$\tau_{avg} = \frac{\sum_1^n \tau_i^2 \alpha_i}{\sum_1^n \tau_i \alpha_i} \quad (S1)$$

**Quantum Yield Measurements.** The fluorescence quantum yield ( $\Phi_F$  or  $\Phi$ ) of all the derivatives was measured using the following relation:

$$\phi_u = \phi_r \frac{F_u A_r \eta_u^2 q_r}{F_r A_u \eta_r^2 q_u} \quad (S2)$$

where, ‘F’ represents the corrected fluorescence peak area, ‘A’ the absorbance at the excitation wavelength, ‘ $\eta$ ’ the refractive index of the solvent used, ‘q’ the excitation light intensity, and the subscripts ‘r’ and ‘u’ refer to reference and unknown, respectively. For calculating  $\phi$  of all the compounds in cyclohexane (CyH) and acetonitrile (ACN), anthracene ( $\phi = 0.36$  at 350 nm in cyclohexane) was used as a reference standard. For calculating  $\phi$  of **BTDPPhNMe<sub>2</sub>**, coumarin 30 ( $\phi_F = 0.67$  at 380 nm in acetonitrile) was used as a reference standard. The radiative ( $k_r$ ) and non-radiative ( $k_{nr}$ ) rate constants were calculated using the formulae:

$$k_r = \frac{\Phi}{\tau} \quad (S3) \quad \text{and} \quad k_{nr} = \frac{1}{\tau} - k_r \quad (S4)$$

**X-ray Crystal Structure Determination.** The crystals of **BTDPPhPh** and **BTDPPh<sup>t</sup>But** suitable for single crystal X-ray analysis were obtained by slow evaporation of the saturated DCM solution. The transparent crystals were chosen and mounted along its longest dimension. **BTDPPhPh** crystals are blocks in shape whereas **BTDPPh<sup>t</sup>But** are of flake type. The X-ray diffraction data for both **BTDs** (**BTDPPhPh** and **BTDPPh<sup>t</sup>But**) were collected on Bruker Axs (Kappa Apex 2) CCD diffractometer equipped with a graphite monochromated Mo K $\alpha$  ( $\lambda = 0.71073$  Å) radiation source at 296 K. The data was integrated using SAINT PLUS and absorption correction was done using multi-scan absorption correction method (SADABS).<sup>3</sup> The structures were solved by direct method (SHELXS-97) and were refined using SHELXL-2018/3 program. All non-hydrogen atoms were refined anisotropically. The direct current (DC) magnetic measurement was performed on vibrating sample magnetometer at variable temperature. The crystallographic table and refinement parameters are provided in Tables S2 and S3 for **BTDPPhPh** and **BTDPPh<sup>t</sup>But**, respectively.

**Theoretical Calculations.** The computational calculations were performed using the Gaussian 16 computational package. Optimization of the ground state of the compounds was carried out using density functional theory (DFT) with B3LYP hybrid functional and 6-311+g(d,p) basis

set without any symmetry constraints. Vibrational analyses were carried out to ascertain the absence of imaginary frequencies. The effect of solvent was included through self-consistent reaction field (SCRf) using a polarizable continuum model (PCM). Excited state geometries were also optimized using the B3LYP/6-311+g(d,p) combination. Potential energy surface (PES) scans were done using a relaxed redundant coordinate scan system using B3LYP/6-311+g(d,p). TD-DFT calculations for both absorption and emission were done using the CAM-B3LYP functional and the same basis set. The electron density difference (EDD) between the excited state and the ground state [ $\Delta\rho(r) = \rho^{S_1}(r) - \rho^{S_0}(r)$ ] were calculated using Multiwfn software, where  $\rho^{S_1}$  and  $\rho^{S_0}$  must have the same geometry.  $\Delta\rho$  can be divided into positive ( $\rho^+$ ) and negative ( $\rho^-$ ) parts, which indicate the regions where electron density has increased and decreased, respectively, after excitation.  $t$ -index is a measure of CT character in a molecule and is given by:<sup>4</sup>

$$t_{\text{index}} = D_{\text{index}} - H_{\text{CT}} \quad (\text{S5})$$

where  $D$  index (or  $d_{\text{CT}}$ ) is the distance between the two barycenters of  $\Delta\rho$  ( $\rho^+$  and  $\rho^-$ ) or the total CT length and  $H_{\text{CT}}$  is the average degree of spatial extension of  $\rho^+$  and  $\rho^-$  in CT direction. If  $t$ -index is less than 0, it means that  $\rho^+$  and  $\rho^-$  are not considerably separated due to CT. A positive value of  $t$ -index implies a significant separation of  $\rho^+$  and  $\rho^-$  distributions due to CT and the transition should be identified as a typical CT transition.

**Electrochemical Studies.** Electrochemical measurements were done at room temperature ( $25 \pm 1$  °C) using the electrochemical workstation (CH Instruments 660A) at a scan rate of 0.1 V/s using three electrode system i.e., glassy carbon as working electrode, platinum wire as counter electrode, and Ag/AgCl, KCl (saturated) as reference electrode. All the experiments were done in distilled and nitrogen-purged acetonitrile (ACN) as the solvent using tetra-*n*-butylammonium hexafluorophosphate ( $[n\text{-Bu}_4\text{N}][\text{PF}_6]$ , 0.1 M) as the non-aqueous supporting electrolyte. All the cyclic voltammograms were calibrated using ferrocene (Fc) as the external standard for each experiment and were corrected. The concentration of the analyte dyes was ca. 1 mM.

**Fluorescence Anisotropy Studies.** The fluorescence anisotropy value ( $r$ ) is given by the equation:<sup>5</sup>

$$r = \frac{I_{\parallel} - I_{\perp}}{I_{\parallel} + 2I_{\perp}} \quad (\text{S6})$$

Where  $I_{\parallel}$  and  $I_{\perp}$  are intensities of the emitted light parallel and perpendicular to the direction of the polarized excitation light, respectively. Time-resolved fluorescence anisotropy is given by:

$$r(t) = r_{\infty} + (r_0 - r_{\infty}) \exp\left(\frac{-t}{\theta}\right) \quad (\text{S7})$$

where  $r_0$ ,  $r_\infty$ , and  $\theta$  are the fundamental anisotropy, limiting/residual anisotropy, and rotational correlation time. If the molecule is totally free to rotate, the  $r_\infty$  value of zero is obtained. If there is hindered rotation, i.e., the fluorophore is not fully free to rotate, a non-zero limiting anisotropy value is obtained.

*General procedure for Sonogashira Coupling:* To an oven-dried two-neck round bottomed flask equipped with a reflux condenser and a magnetic stir-bar, 4-bromo-2,1,3-benzothiadiazole (1.0 equivalent) and a solvent mixture of THF and TEA (2:1, v/v) (or DMF and TEA mixture, 2:1, v/v) were added. The resulting solution was degassed with nitrogen gas for 5-7 minutes. Then, the respective alkyne (1.0 equivalent), CuI (5 mol %), and the catalyst Pd(PPh<sub>3</sub>)<sub>2</sub>Cl<sub>2</sub> (4 mol % relative to the bromo derivative) were added, and the whole solution was again degassed with nitrogen gas for 15 minutes. Later, the temperature was raised to 70 °C, and stirring was continued for about 10-12 hours. The progress of the reaction was monitored using TLC. After the disappearance of the alkyne starting material, the reaction contents were cooled to room temperature, the solvents were evaporated, water was added and the organic contents were extracted with chloroform or ethyl acetate (3 times). The combined organic layer was washed with brine solution to remove the inorganic impurities, then dried over anhydrous sodium sulphate, filtered and the solvent was evaporated. The crude product was purified by silica-gel column chromatography using hexane and chloroform as the eluting solvents.

*4-((4-Nitrophenyl)ethynyl)benzo[c][1,2,5]thiadiazole (BTDPHNO<sub>2</sub>)*

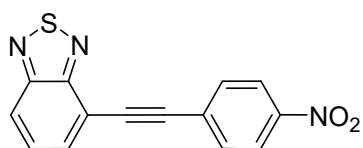

4-Bromobenzothiadiazole (0.35 g, 1.63 mmol) and 1-ethynyl-4-nitrobenzene (0.36 g, 2.45 mmol) were Sonogashira-coupled in presence of Pd(PPh<sub>3</sub>)<sub>2</sub>Cl<sub>2</sub> (0.057 g, 0.08 mmol) and CuI (0.016 g, 0.08 mmol) in THF (4 mL) and TEA (2 mL) solvent mixture (2:1, v/v) at 70 °C. Time: 12 h.; Yield: 0.252 g, 55%; TLC: R<sub>f</sub> = 0.46 (1:1, hexane/chloroform); light yellow solid; MP: 145-147 °C; <sup>1</sup>H NMR (400 MHz, CDCl<sub>3</sub>):  $\delta$  (ppm) 8.27 (d,  $J$  = 8.8 Hz, 2H), 8.08 (d,  $J$  = 8.8 Hz, 1H), 7.86 (d,  $J$  = 7.2 Hz, 1H), 7.81 (d,  $J$  = 8.8 Hz, 2H), 7.64 (dd,  $J_1$  = 8.8 Hz,  $J_2$  = 7.6 Hz, 1H); <sup>13</sup>C NMR (100 MHz, CDCl<sub>3</sub>):  $\delta$  (ppm) 154.7, 154.5, 147.6, 133.5, 132.8, 129.6, 129.3, 123.8, 123.0, 116.2, 93.5, 90.0; IR (KBr, cm<sup>-1</sup>): 3080, 2209, 1593, 1517, 1490, 1340, 1311, 1285, 1271, 1173, 1148, 1105, 901, 853, 831, 808, 800, 749, 684, 517; HR ESI-MS: [C<sub>14</sub>H<sub>7</sub>N<sub>3</sub>O<sub>2</sub>S+H]<sup>+</sup> = [M+H]<sup>+</sup> calculated m/z = 282.0332; found m/z = 282.0333.

4-(Benzo[c][1,2,5]thiadiazol-4-ylethynyl)benzonitrile (**BTDPhCN**)

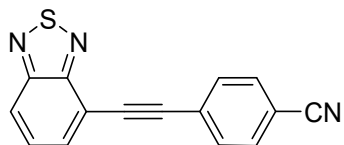

4-Bromobenzothiadiazole (0.35 g, 1.63 mmol) and 4-ethynylbenzonitrile (0.31 g, 2.44 mmol) were Sonogashira-coupled in presence of Pd(PPh<sub>3</sub>)<sub>2</sub>Cl<sub>2</sub> (0.057 g, 0.08 mmol) and CuI (0.016 g, 0.08 mmol) in THF (5 mL) and TEA (2.5 mL) solvent mixture (2:1, v/v) at 70 °C. Time: 14 h.; Yield: 0.340 g, 80%; TLC: R<sub>f</sub> = 0.34 (1:1, hexane/chloroform); light yellow solid; Mp: 151-153 °C; <sup>1</sup>H NMR (400 MHz, CDCl<sub>3</sub>): δ (ppm) 8.06 (d, *J* = 8.8 Hz, 1H), 7.84 (d, *J* = 7.2 Hz, 1H), 7.75 (d, *J* = 8.0 Hz, 2H), 7.68 (d, *J* = 8.4 Hz, 2H), 7.63 (dd, *J*<sub>1</sub> = 6.8 Hz, *J*<sub>2</sub> = 6.8 Hz, 1H); <sup>13</sup>C NMR (100 MHz, CDCl<sub>3</sub>): δ (ppm) 154.7, 154.5, 133.4, 132.3, 132.2, 129.3, 127.6, 122.9, 118.5, 116.3, 112.3, 93.7, 89.2; IR (KBr, cm<sup>-1</sup>): 3059, 2224, 1603, 1536, 1499, 1483, 1406, 1351, 1331, 1272, 1178, 1148, 1029, 901, 858, 833, 822, 807, 752, 550, 508, 472. HR ESI-MS: [C<sub>15</sub>H<sub>7</sub>N<sub>3</sub>S]<sup>+</sup> = [M]<sup>+</sup> calculated m/z = 261.0361; found m/z = 261.0385.

Methyl 4-(benzo[c][1,2,5]thiadiazol-4-ylethynyl)benzoate (**BTDPhCOOMe**)

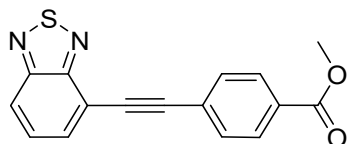

4-Bromobenzothiadiazole (0.35 g, 1.63 mmol) and methyl-4-ethynylbenzoate (0.314 g, 1.96 mmol) were Sonogashira-coupled in presence of Pd(PPh<sub>3</sub>)<sub>2</sub>Cl<sub>2</sub> (0.057 g, 0.08 mmol) and CuI (0.016 g, 0.08 mmol) in THF (5 mL) and TEA (2.5 mL) solvent mixture (2:1, v/v) at 70 °C. Time: 11 h.; Yield: 0.431 g, 90%; TLC: R<sub>f</sub> = 0.34 (1:1, hexane/chloroform); Off-white solid; Mp: 179-181 °C; <sup>1</sup>H NMR (400 MHz, CDCl<sub>3</sub>): δ (ppm) 8.06 (d, *J* = 8.4 Hz, 2H), 8.03 (d, *J* = 8.4 Hz, 1H), 7.83 (d, *J* = 7.2 Hz, 1H), 7.72 (d, *J* = 8.4 Hz, 2H), 7.608 (dd, *J*<sub>1</sub> = 7.2 Hz, *J*<sub>2</sub> = 7.2 Hz, 1H), 3.94 (s, 3H); <sup>13</sup>C NMR (100 MHz, CDCl<sub>3</sub>): δ (ppm) 166.6, 154.7, 154.6, 133.2, 133.1, 132.0, 130.2, 129.7, 129.66, 129.32, 127.4, 122.5, 116.8, 94.8, 87.9, 52.4; IR (KBr, cm<sup>-1</sup>): 3076, 3062, 3012, 2957, 2212, 1716, 1605, 1537, 1489, 1428, 1403, 1325, 1305, 1272, 1243, 1190, 1174, 1105, 1028, 1015, 959, 901, 854, 830, 805, 767, 748, 693. HR ESI-MS: [C<sub>16</sub>H<sub>10</sub>N<sub>2</sub>O<sub>2</sub>S+H]<sup>+</sup> = [M+H]<sup>+</sup> calculated m/z = 295.0536; found m/z = 295.05541.

4-((6,7-Dihydrobenzo[*c*][1,2,5] thiadiazol-4-yl)ethynyl)benzaldehyde (**BTDPhCHO**)

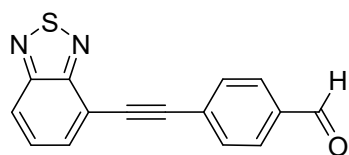

4-Bromobenzothiadiazole (0.35 g, 1.63 mmol) and 4-ethynylbenzaldehyde (0.319 g, 2.45 mmol) were Sonogashira-coupled in presence of Pd(PPh<sub>3</sub>)<sub>2</sub>Cl<sub>2</sub> (0.057 g, 0.08 mmol) and CuI (0.016 g, 0.08 mmol) in THF (5 mL) and TEA (2.5 mL) solvent mixture (2:1, v/v) at 70 °C. Time: 12 h.; Yield: 0.322 g, 75%; TLC: R<sub>f</sub> = 0.31 (1:1, hexane/chloroform); Greenish-yellow solid; Mp: 140-142 °C; <sup>1</sup>H NMR (400 MHz, CDCl<sub>3</sub>): δ (ppm) 10.10 (s, 1H), 8.05 (d, *J* = 8.8 Hz, 1H), 7.91 (d, *J* = 8.0 Hz, 2H), 7.85 (d, *J* = 8.0 Hz, 1H), 7.81 (d, *J* = 8.8 Hz, 2H), 7.62 (dd, *J*<sub>1</sub> = 7.2 Hz and *J*<sub>2</sub> = 7.2 Hz, 1H); <sup>13</sup>C NMR (100 MHz, CDCl<sub>3</sub>): δ (ppm) 191.5, 154.7, 154.5, 136.0, 133.3, 132.6, 129.7, 129.3, 129.0, 122.7, 116.5, 94.6, 88.9; IR (KBr, cm<sup>-1</sup>): 3062, 2847, 2743, 2207, 1698, 1598, 1560, 1410, 1386, 1354, 1327, 1300, 1287, 1274, 1206, 1162, 1101, 899, 854, 827, 808, 788, 753, 708, 529, 470; HR ESI-MS: [C<sub>15</sub>H<sub>8</sub>N<sub>2</sub>OS+H]<sup>+</sup> = [M+H]<sup>+</sup> calculated m/z = 265.043; found m/z = 265.043.

7-(Phenylethynyl)-4,5-dihydrobenzo[*c*][1,2,5]thiadiazole (**BTDPh**)

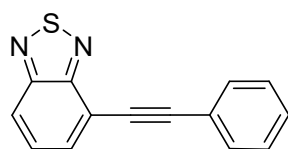

4-Bromobenzothiadiazole (0.35 g, 1.62 mmol) and ethynylbenzene (0.21 mL, 1.96 mmol) were Sonogashira-coupled in presence of Pd(PPh<sub>3</sub>)<sub>2</sub>Cl<sub>2</sub> (0.057 g, 0.08 mmol) and CuI (0.016 g, 0.08 mmol) in THF (4 mL) and TEA (2 mL) solvent mixture (2:1, v/v) at 70 °C. Time: 12 h.; Yield: 0.312 g, 81%; TLC: R<sub>f</sub> = 0.78 (1:1, hexane/chloroform); Yellowish-white solid; Mp: 82-84 °C; <sup>1</sup>H NMR (400 MHz, CDCl<sub>3</sub>): δ (ppm) 8.00 (d, *J* = 8.8 Hz, 1H), 7.80 (d, *J* = 7.2 Hz, 1H), 7.68-7.66 (m, 2H), 7.60 (dd, *J*<sub>1</sub> = 8.8 Hz, *J*<sub>2</sub> = 7.2 Hz, 1H), 7.40-7.38 (m, 3H); <sup>13</sup>C NMR (100 MHz, CDCl<sub>3</sub>): δ (ppm) 154.7, 154.6, 132.7, 132.1, 129.3, 129.0, 128.5, 122.7, 121.9, 117.3, 95.9, 85.2; IR (KBr, cm<sup>-1</sup>): 3076, 3060, 3030, 3017, 2217, 1655, 1597, 1536, 1489, 1439, 1327, 1275, 1069, 1031, 970, 921, 901, 853, 831, 803, 759, 750, 693, 587, 533, 513, 490, 408; HR ESI-MS: [C<sub>14</sub>H<sub>8</sub>N<sub>2</sub>S+H]<sup>+</sup> = [M+H]<sup>+</sup> calculated m/z = 237.0481; found m/z = 237.0477.

4-([1,1'-Biphenyl]-4-ylethynyl)benzo[*c*][1,2,5]thiadiazole (**BTDPhPh**)

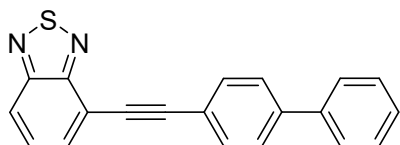

4-Bromobenzo[*c*][1,2,5]thiadiazole (0.35 g, 1.63 mmol) and 4-ethynyl-1,1'-biphenyl (0.349 g, 1.96 mmol) were Sonogashira-coupled in presence of Pd(PPh<sub>3</sub>)<sub>2</sub>Cl<sub>2</sub> (0.057 g, 0.08 mmol) and CuI (0.016 g, 0.08 mmol) in THF (5 mL) and TEA (2.5 mL) solvent mixture (2:1, v/v) at 70 °C. Time: 13 h.; Yield: 0.381 g, 75%; TLC: R<sub>f</sub> = 0.81 (1:1, hexane/chloroform); yellow solid; Mp: 156-158 °C; <sup>1</sup>H NMR (400 MHz, CDCl<sub>3</sub>): δ (ppm) 8.01 (d, *J* = 8.8 Hz, 1H), 7.82 (d, *J* = 6.8 Hz, 1H), 7.74 (d, *J* = 8.0 Hz, 2H), 7.65-7.59 (m, 5H), 7.47 (t, *J* = 7.2 Hz, 2H), 7.38 (t, *J* = 7.2 Hz, 1H); <sup>13</sup>C NMR (100 MHz, CDCl<sub>3</sub>): δ (ppm) 154.7, 154.8, 141.7, 140.3, 132.7, 132.5, 129.3, 129.0, 127.9, 127.2, 121.9, 121.6, 117.3, 95.9, 85.9; IR (KBr, cm<sup>-1</sup>): 3051, 3030, 2205, 1578, 1538, 1519, 1486, 1446, 1402, 1355, 1327, 1140, 1111, 1028, 1004, 901, 858, 838, 815, 804, 766, 745, 717, 692, 681, 510; HR ESI-MS: [C<sub>20</sub>H<sub>12</sub>N<sub>2</sub>S+H]<sup>+</sup> = [M + H]<sup>+</sup> calculated m/z = 313.0794; found m/z = 313.0803.

4-((4-(*Tert*-butyl)phenyl)ethynyl)benzo[*c*][1,2,5]thiadiazole (**BTDPh<sup>t</sup>But**)

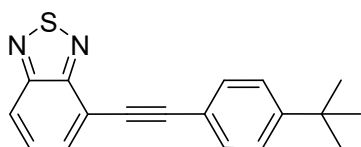

4-Bromobenzo[*c*][1,2,5]thiadiazole (0.35 g, 1.63 mmol) and 1-(*tert*-butyl)-4-ethynylbenzene (0.310 g, 1.96 mmol) were Sonogashira-coupled in presence of Pd(PPh<sub>3</sub>)<sub>2</sub>Cl<sub>2</sub> (0.057 g, 0.08 mmol) and CuI (0.016 g, 0.08 mmol) in THF (5 mL) and TEA (2.5 mL) solvent mixture (2:1, v/v) at 70 °C. Time: 15 h.; Yield: 0.442 g, 93%; TLC: R<sub>f</sub> = 0.78 (1:1, hexane/chloroform); bright yellow solid; Mp: 105-107 °C; <sup>1</sup>H NMR (400 MHz, CDCl<sub>3</sub>): δ (ppm) 7.98 (d, *J* = 8.8 Hz, 1H), 7.79 (d, *J* = 7.2 Hz, 1H), 7.61-7.56 (m, 3H), 7.41 (d, *J* = 8.4 Hz, 2H), 1.34 (s, 9H); <sup>13</sup>C NMR (100 MHz, CDCl<sub>3</sub>): δ (ppm) 154.8, 154.7, 152.4, 132.6, 131.8, 129.4, 125.5, 121.6, 119.7, 117.6, 96.2, 84.6, 35.0, 31.3; IR (KBr, cm<sup>-1</sup>): 2947, 2901, 2862, 2209, 1655, 1584, 1539, 1502, 1483, 1463, 1406, 1389, 1362, 1327, 1265, 1105, 1027, 904, 852, 836, 809, 755, 560, 505. HR ESI-MS: [C<sub>18</sub>H<sub>16</sub>N<sub>2</sub>S+H]<sup>+</sup> = [M+H]<sup>+</sup> calculated m/z = 293.1107; found m/z = 293.1118.

4-((4-Methoxyphenyl)ethynyl)benzo[*c*][1,2,5]thiadiazole (**BTDPhOMe**)

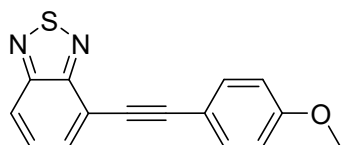

4-Bromobenzothiadiazole (0.35 g, 1.63 mmol) and 1-ethynyl-4-methoxybenzene (0.280 g, 2.12 mmol) were Sonogashira-coupled in presence of Pd(PPh<sub>3</sub>)<sub>2</sub>Cl<sub>2</sub> (0.057 g, 0.08 mmol) and CuI (0.016 g, 0.08 mmol) in THF (5 mL) and TEA (2.5 mL) solvent mixture (2:1, v/v) at 70 °C. Time: 15 h.; Yield: 0.347 g, 80%; TLC: R<sub>f</sub> = 0.59 (1:1, hexane/chloroform); greenish yellow solid; Mp: 127-129 °C; <sup>1</sup>H NMR (400 MHz, CDCl<sub>3</sub>): δ 7.97 (d, *J* = 8.80 Hz, 1H), 7.77 (d, *J* = 6.8 Hz, 1H), 7.63-7.56 (m, 3H), 6.92 (d, *J* = 8.7 Hz, 2H), 3.85 (s, 3H); <sup>13</sup>C NMR (100 MHz, CDCl<sub>3</sub>): δ (ppm) 160.3, 154.8, 154.7, 133.7, 132.4, 129.4, 121.5, 117.7, 114.8, 114.2, 96.2, 84.1, 55.5; IR (KBr, cm<sup>-1</sup>): 2962, 2915, 2838, 2211, 1604, 1582, 1567, 1536, 1507, 1466, 1456, 1438, 1321, 1290, 1249, 1183, 1170, 1147, 1105, 1051, 1030, 1023, 903, 852, 836, 807, 756, 533, 515, 501, 448; HR ESI-MS: [C<sub>15</sub>H<sub>10</sub>N<sub>2</sub>OS+H]<sup>+</sup> = [M+H]<sup>+</sup> calculated m/z = 267.0587; found m/z = 267.0596.

*4-(Benzo[*c*][1,2,5]thiadiazol-4-ylethynyl)-*N,N*-dimethylaniline (BTDP*h*Me<sub>2</sub>)*

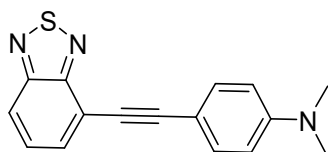

4-Bromobenzothiadiazole (0.35 g, 1.63 mmol) and 4-ethynyl-*N,N*-dimethylaniline (0.284 g, 1.96 mmol) were Sonogashira-coupled in presence of Pd(PPh<sub>3</sub>)<sub>2</sub>Cl<sub>2</sub> (0.057 g, 0.08 mmol) and CuI (0.016 g, 0.08 mmol) in THF (5 mL) and TEA (2.5 mL) solvent mixture (2:1, v/v) at 70 °C. Time: 14 h.; Yield: 386 g, 85%; TLC: R<sub>f</sub> = 0.46 (1:1, hexane/chloroform); brown-yellow solid; Mp: 127-129°C; <sup>1</sup>H NMR (400 MHz, CDCl<sub>3</sub>): δ 7.93 (d, *J* = 8.8 Hz, 1H), 7.73 (d, *J* = 6.8 Hz, 1H), 7.58-7.53 (m, 3H), 6.68 (d, *J* = 7.6 Hz, 2H), 3.01 (s, 6H); <sup>13</sup>C NMR (100 MHz, CDCl<sub>3</sub>): δ (ppm) 154.8.3, 154.7, 150.6, 133.4, 131.8, 129.5, 120.8, 118.3, 111.8, 109.3, 97.9, 83.7, 40.3; IR (KBr, cm<sup>-1</sup>): 3039, 2997, 2909, 2858, 2807, 2209, 1584, 1536, 1518, 1481, 1442, 1359, 1300, 1228, 1209, 1182, 1169, 1123, 1066, 1035, 1026, 943, 901, 820, 808, 752, 535, 498; HR ESI-MS: [C<sub>16</sub>H<sub>13</sub>N<sub>3</sub>S+H]<sup>+</sup> = [M+H]<sup>+</sup> calculated m/z = 280.0903; found m/z = 280.0912.



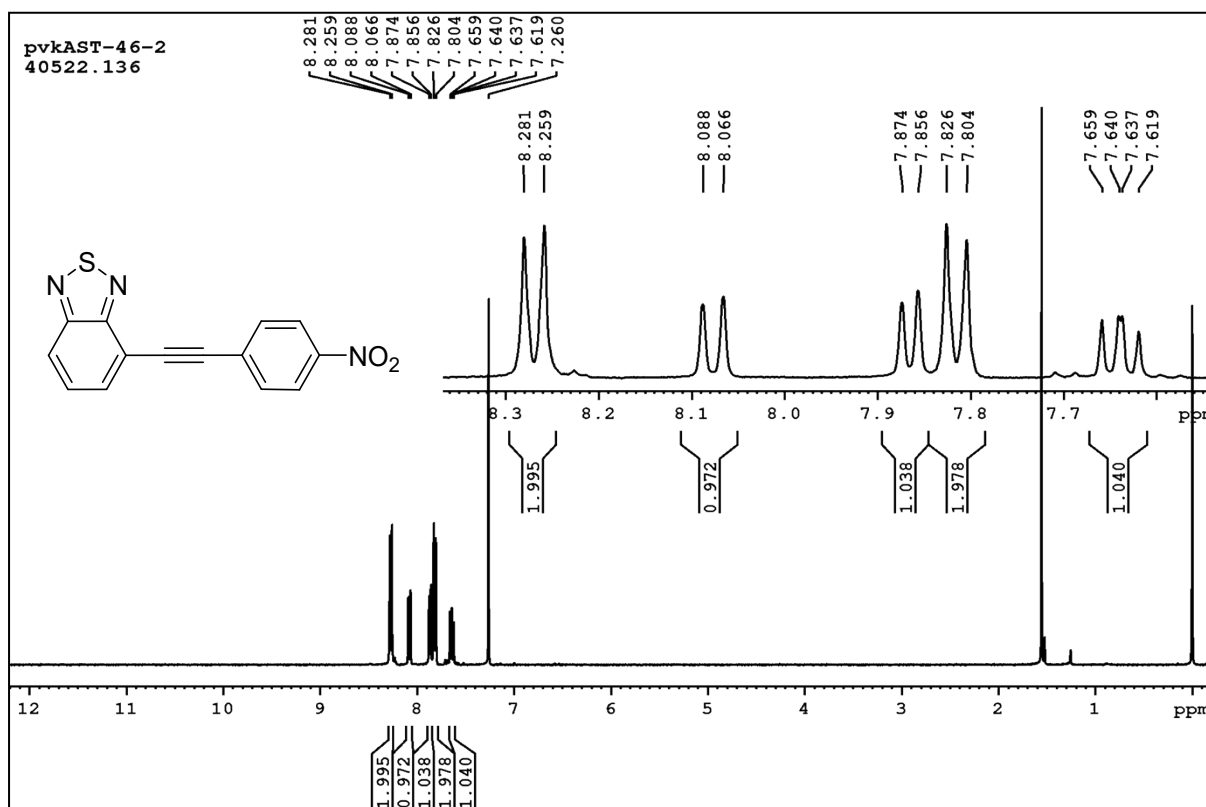

Fig. S1. <sup>1</sup>H NMR spectrum of BTDPPhNO<sub>2</sub> in CDCl<sub>3</sub>.

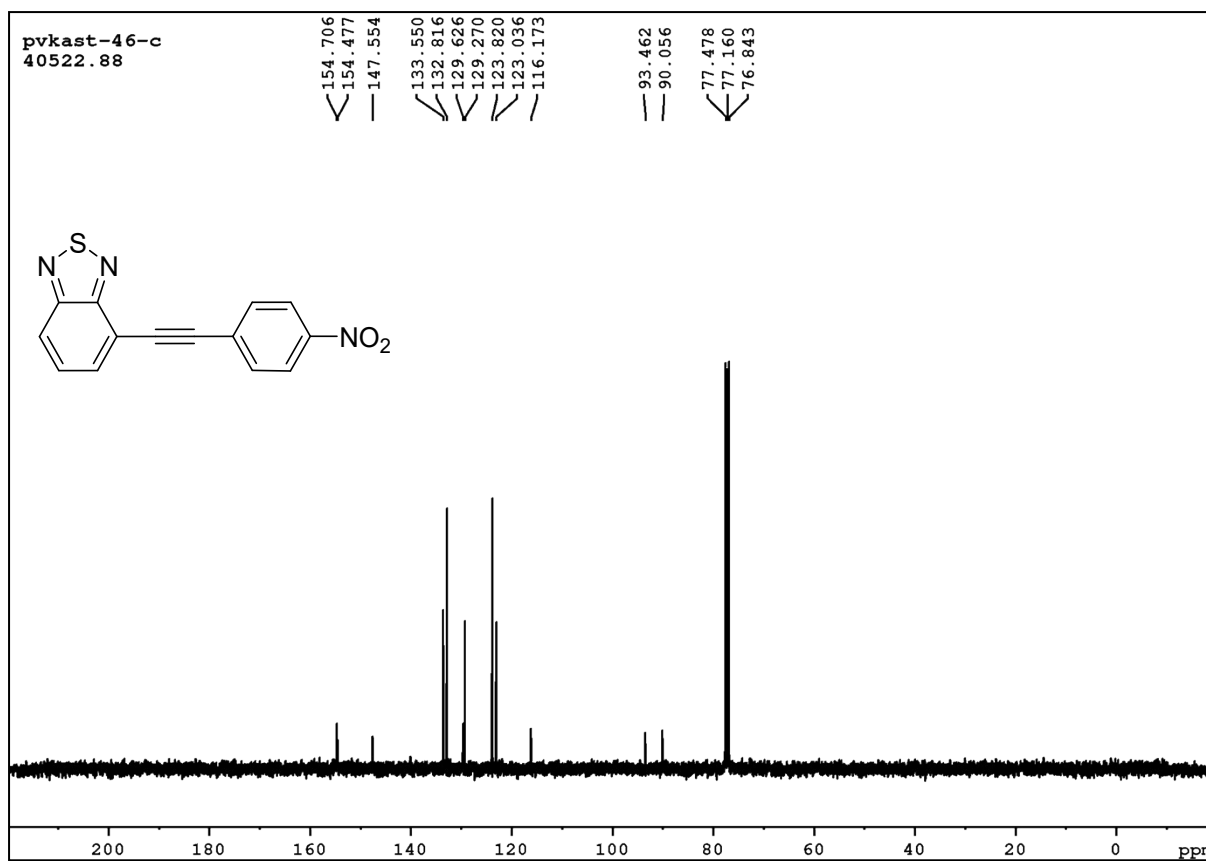

Fig. S2.  $^{13}\text{C}$  NMR spectrum of **BTDPPhNO<sub>2</sub>** in  $\text{CDCl}_3$ .

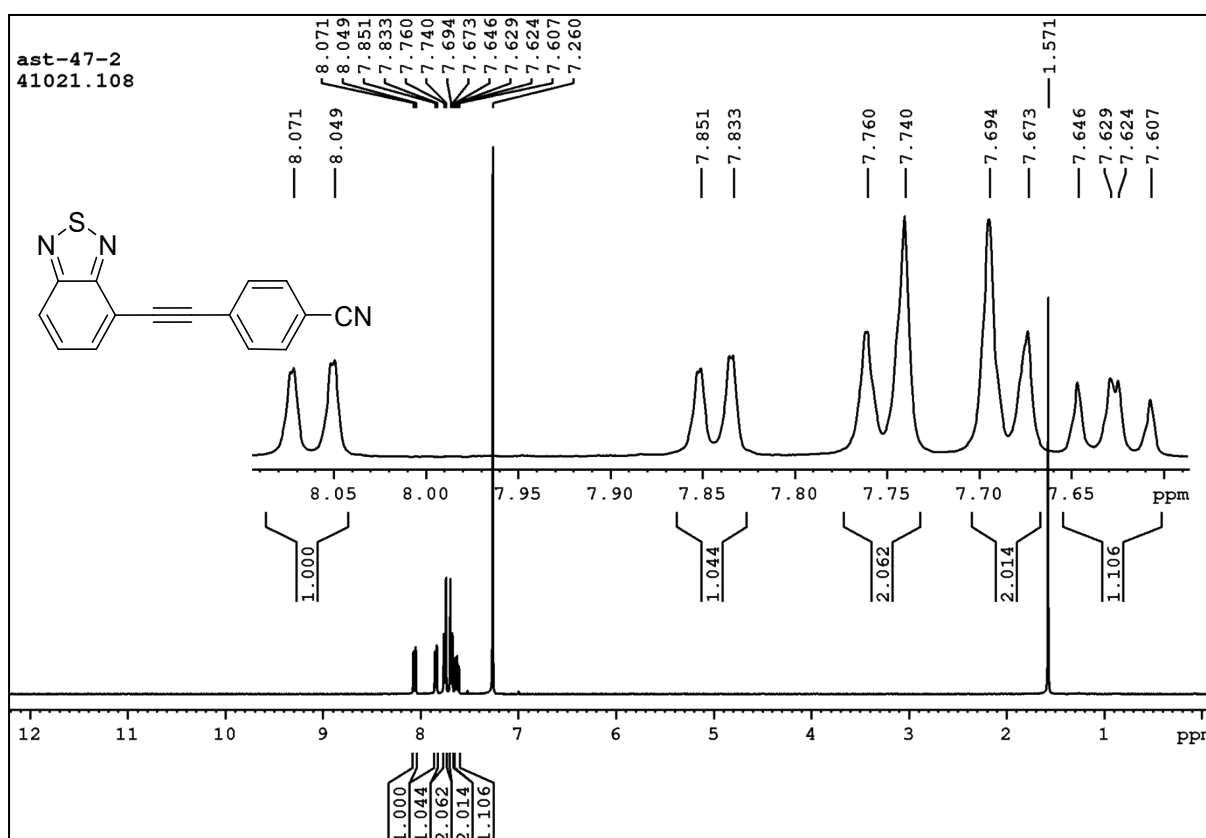

Fig. S3.  $^1\text{H}$  NMR spectrum of **BTDPPhCN** in  $\text{CDCl}_3$ .

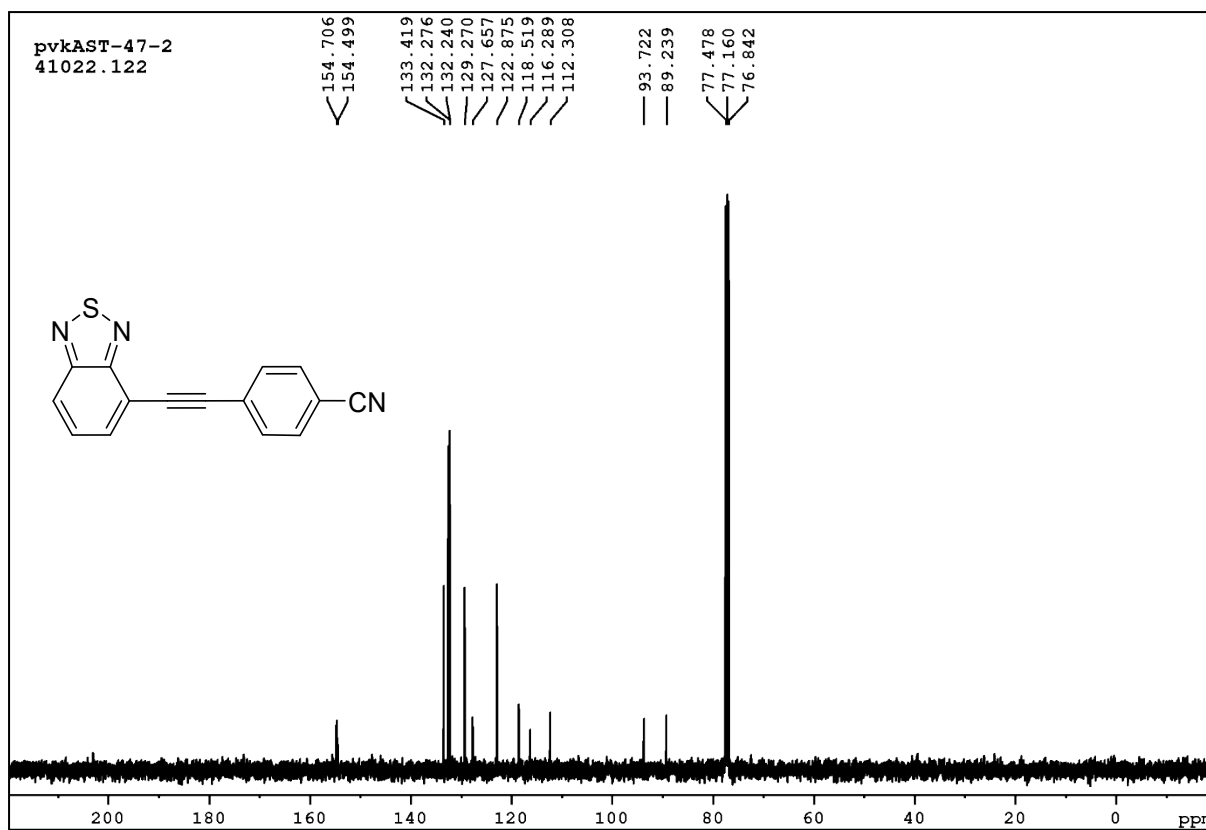

Fig. S4. <sup>13</sup>C NMR spectrum of BTDPhCN in CDCl<sub>3</sub>.

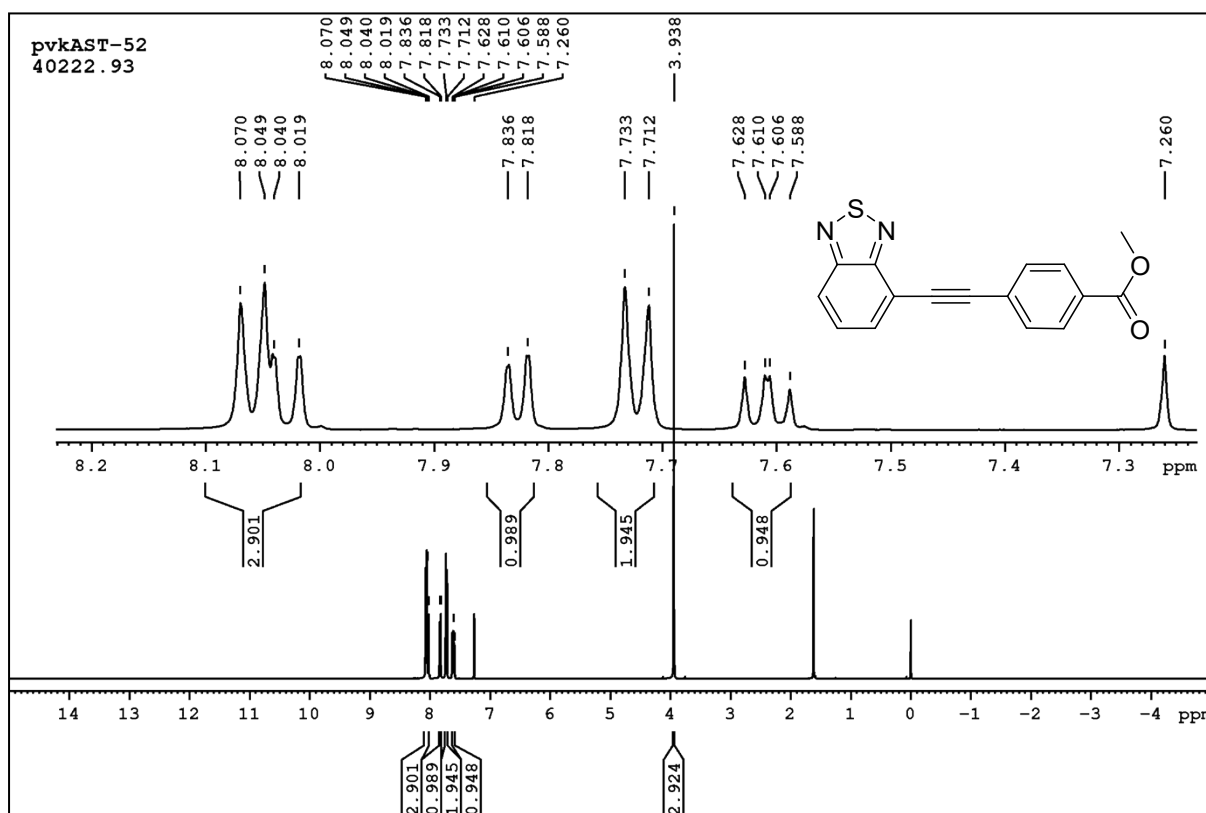

Fig. S5. <sup>1</sup>H NMR spectrum of BTDPhCOOMe in CDCl<sub>3</sub>.

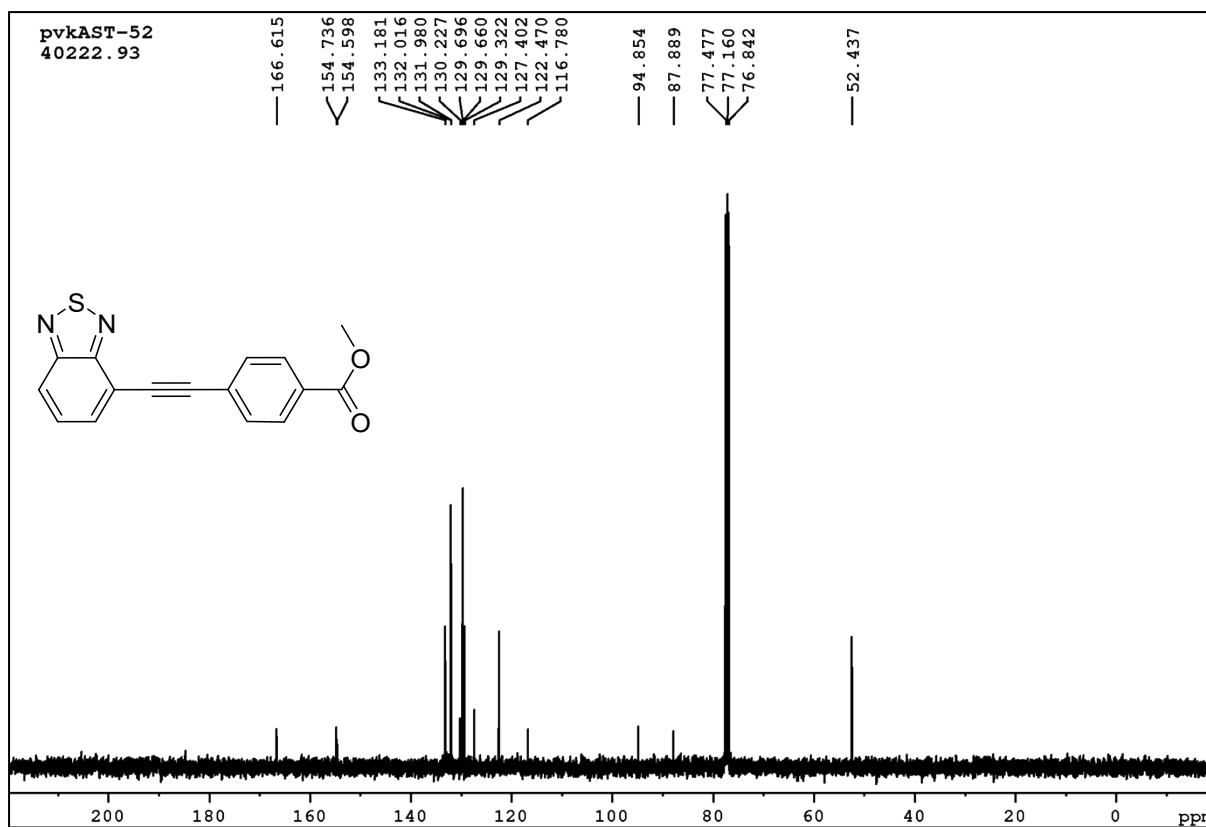

Fig. S6.  $^{13}\text{C}$  NMR spectrum of BTDPhCOOMe in  $\text{CDCl}_3$ .

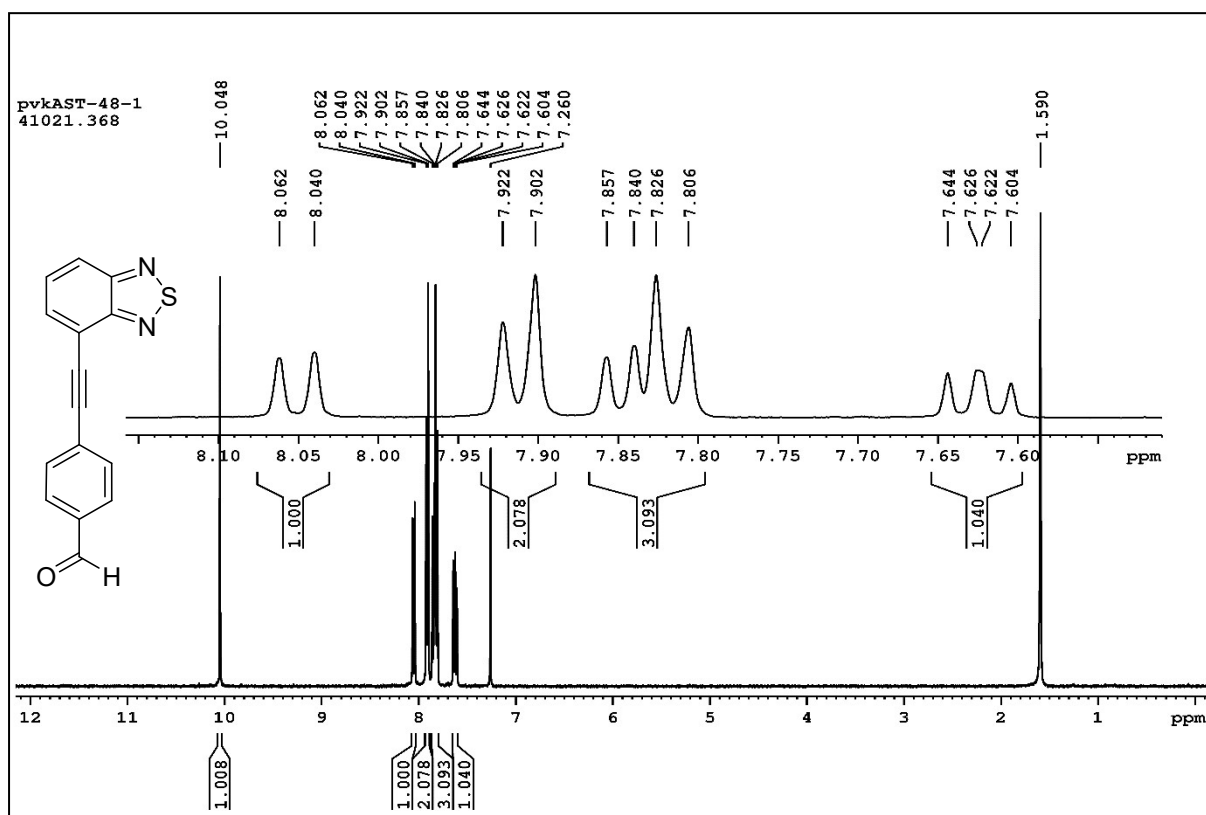

Fig. S7.  $^1\text{H}$  NMR spectrum of BTDPhCHO in  $\text{CDCl}_3$ .

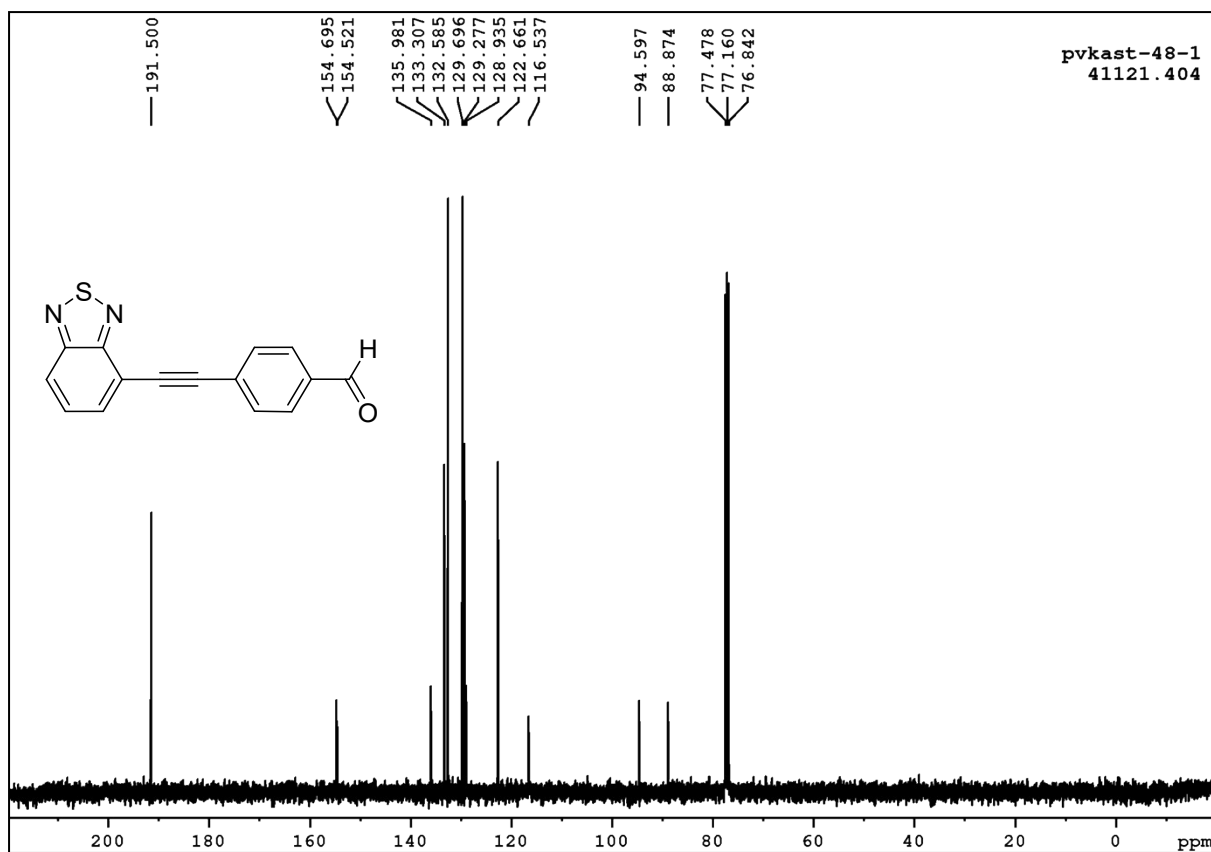

Fig. S8. <sup>13</sup>C NMR spectrum of BTDPPhCHO in CDCl<sub>3</sub>.

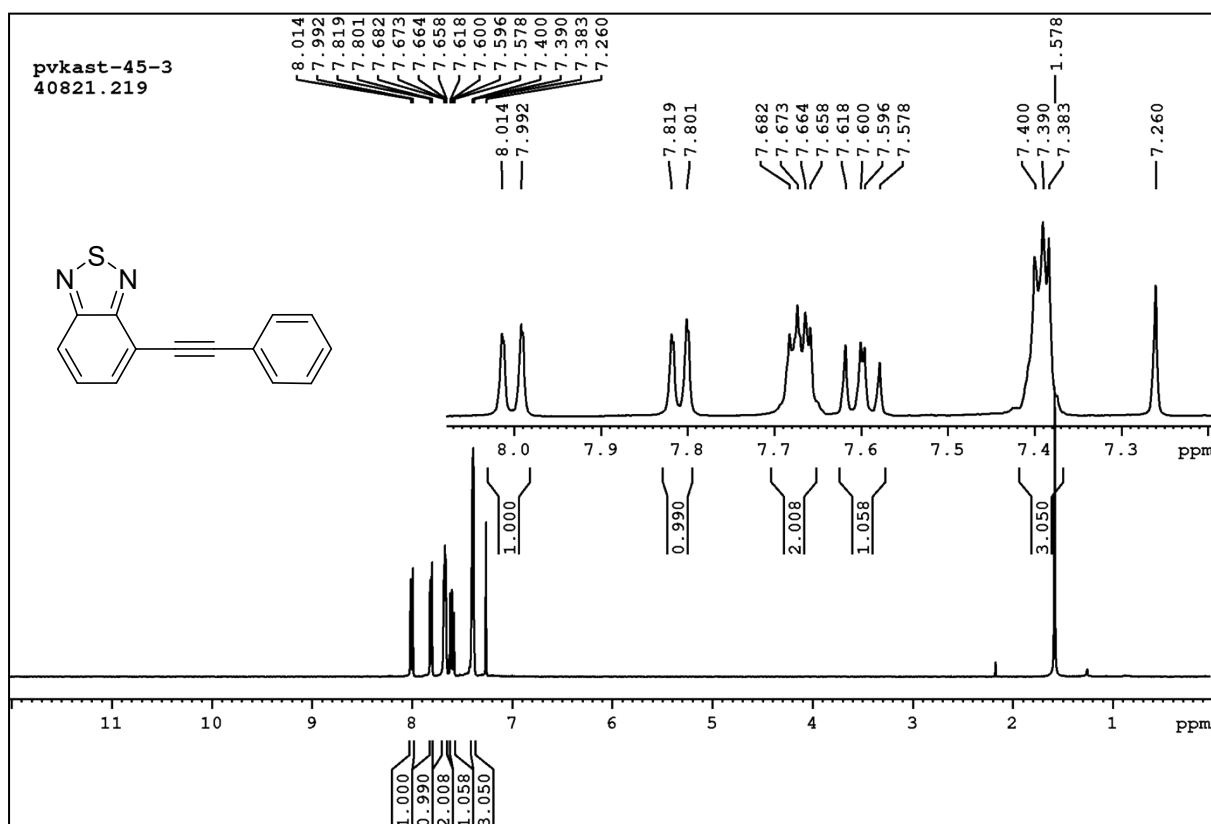

Fig. S9. <sup>1</sup>H NMR spectrum of BTDPPh in CDCl<sub>3</sub>.

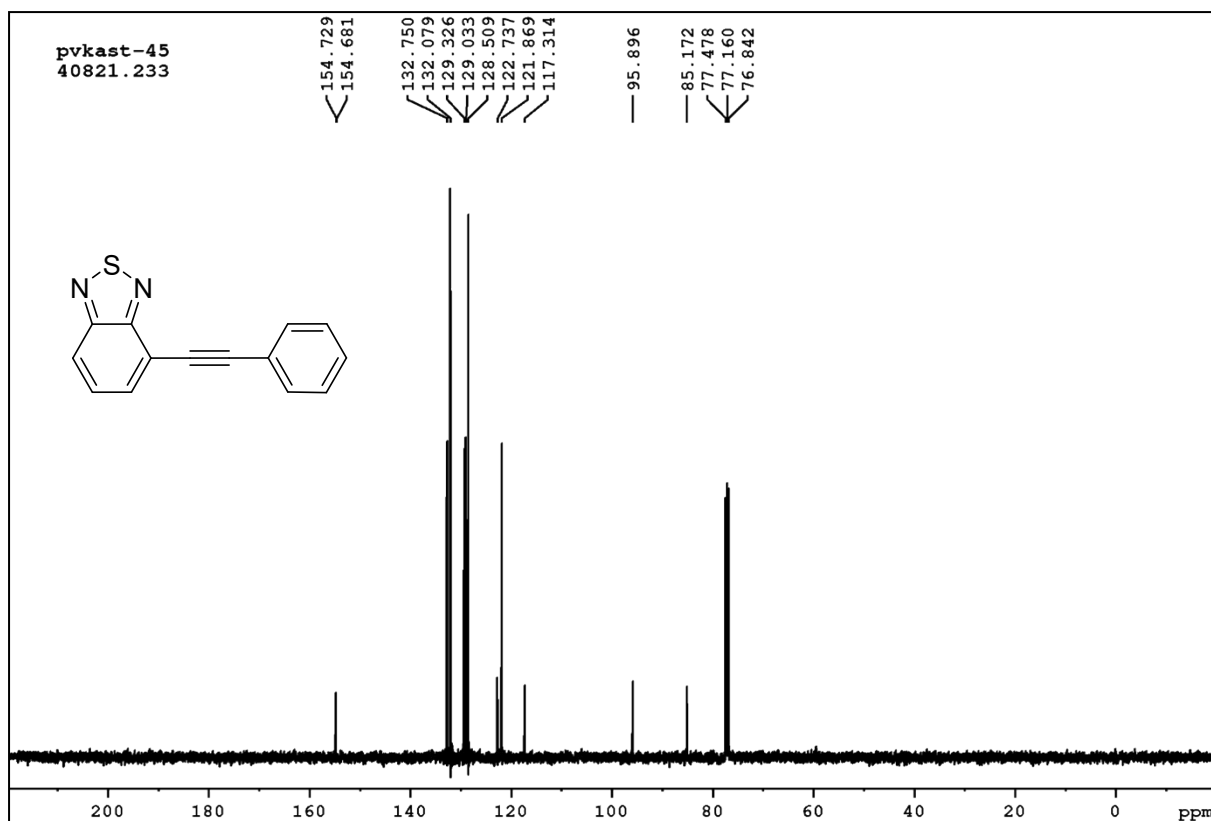

Fig. S10.  $^{13}\text{C}$  NMR spectrum of BTDPH in  $\text{CDCl}_3$ .

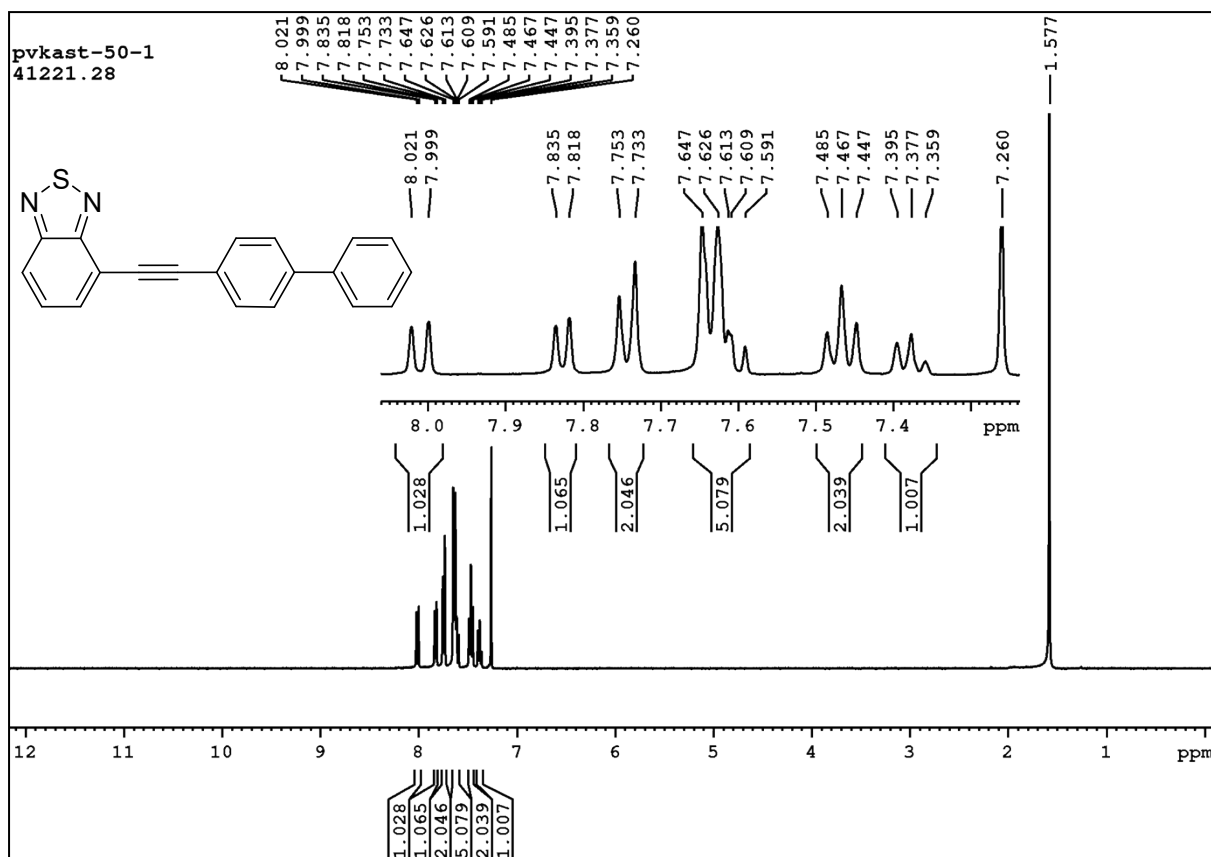

Fig. S11.  $^1\text{H}$  NMR spectrum of BTDPHPh in  $\text{CDCl}_3$ .

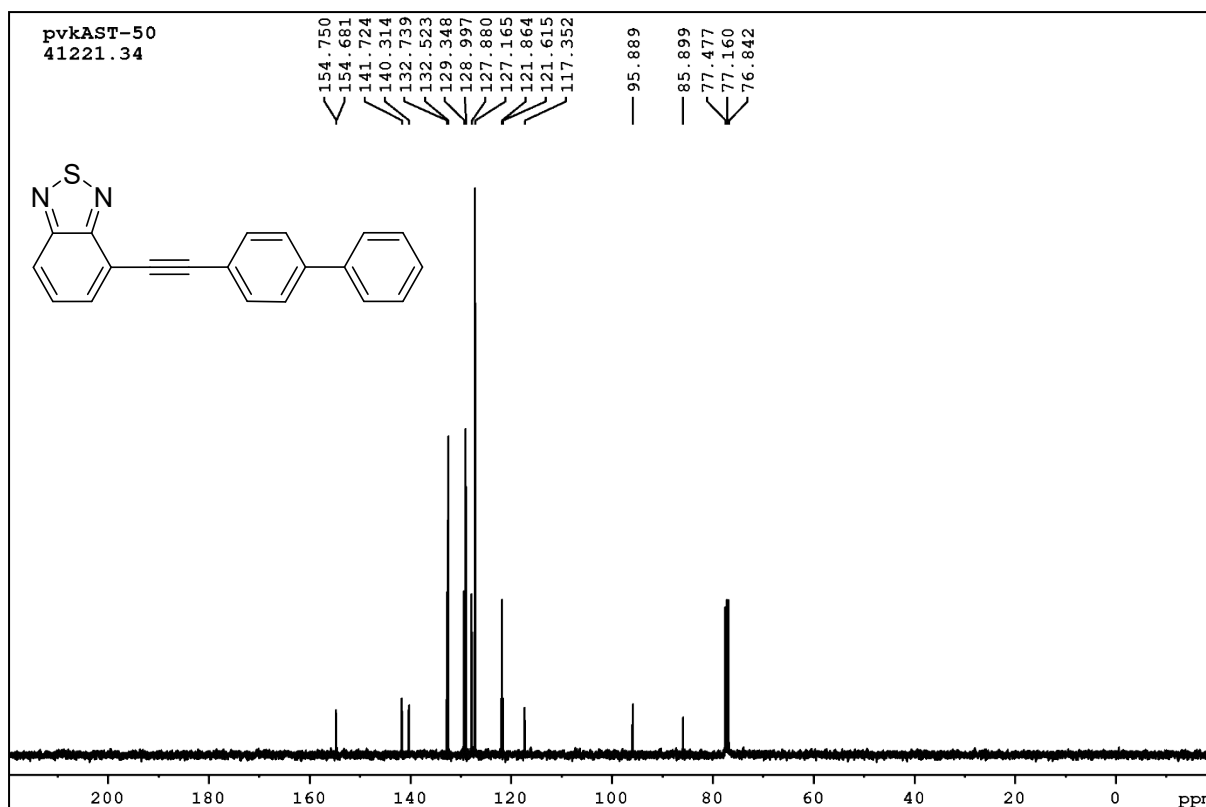

Fig. S12.  $^{13}\text{C}$  NMR spectrum of **BTDPhPh** in  $\text{CDCl}_3$ .

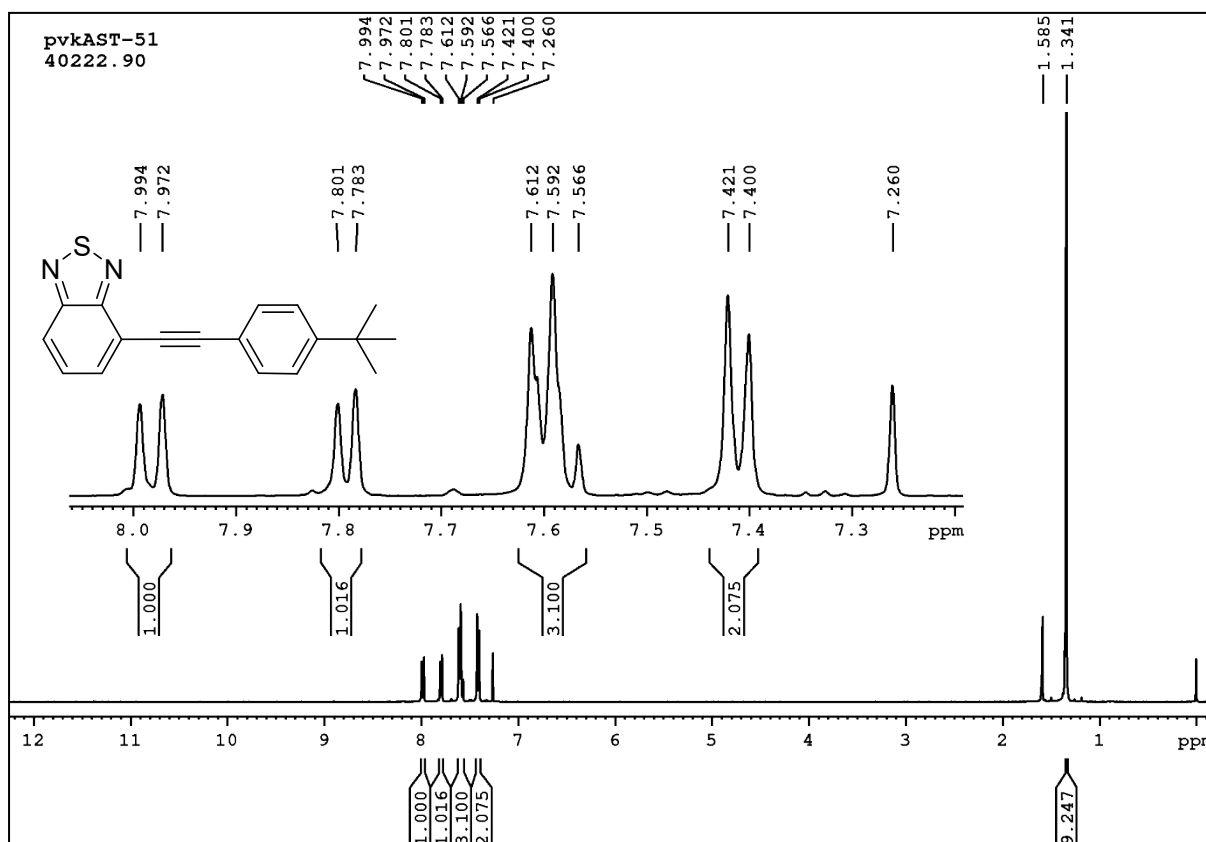

Fig. S13.  $^1\text{H}$  NMR spectrum of **BTDPh<sup>4</sup>But** in  $\text{CDCl}_3$ .

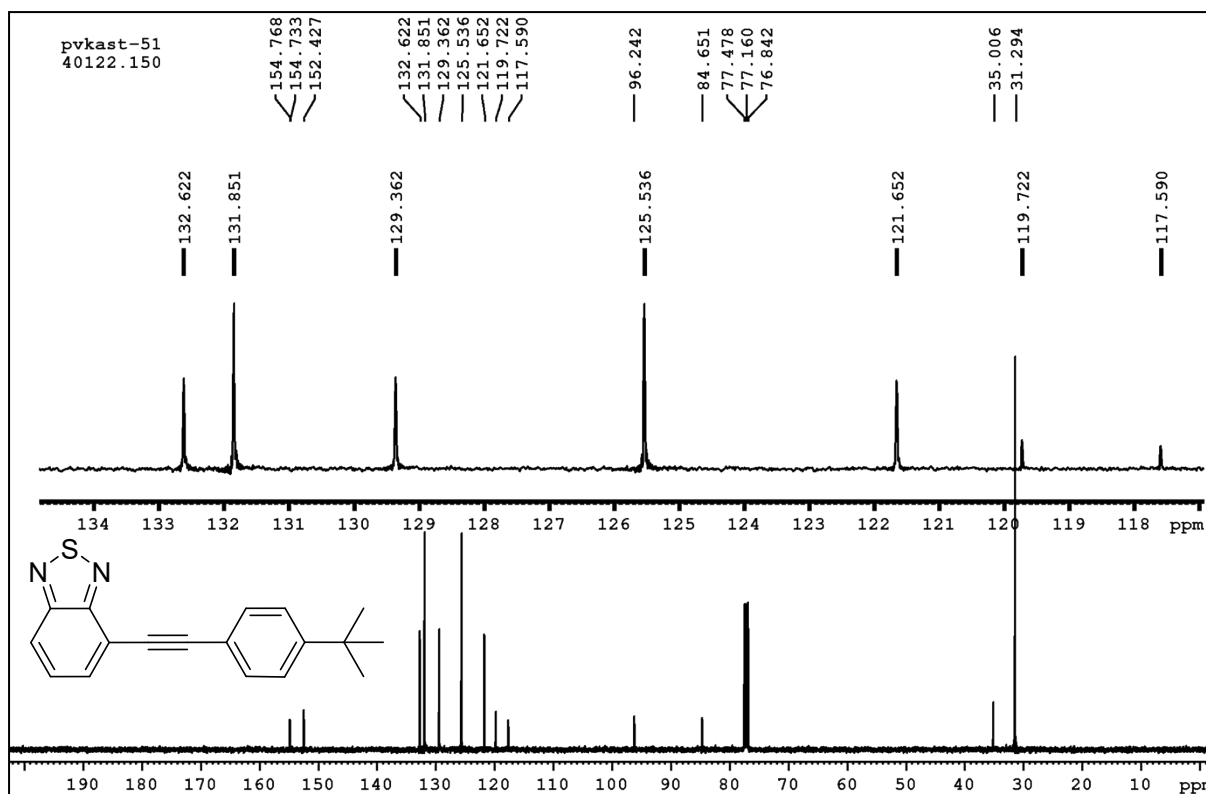

Fig. S14.  $^{13}\text{C}$  NMR spectrum of BTDPh<sup>4</sup>But in  $\text{CDCl}_3$ .

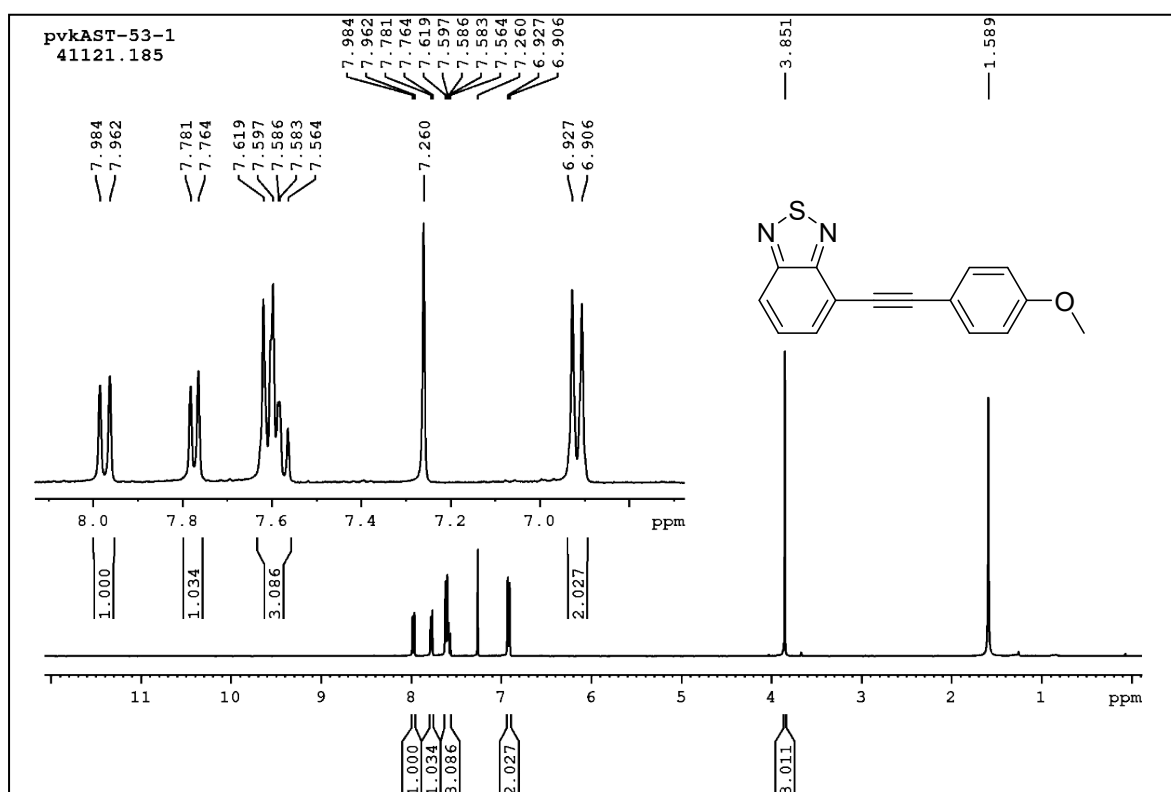

Fig. S15.  $^1\text{H}$  NMR spectrum of BTDPhOMe in  $\text{CDCl}_3$ .





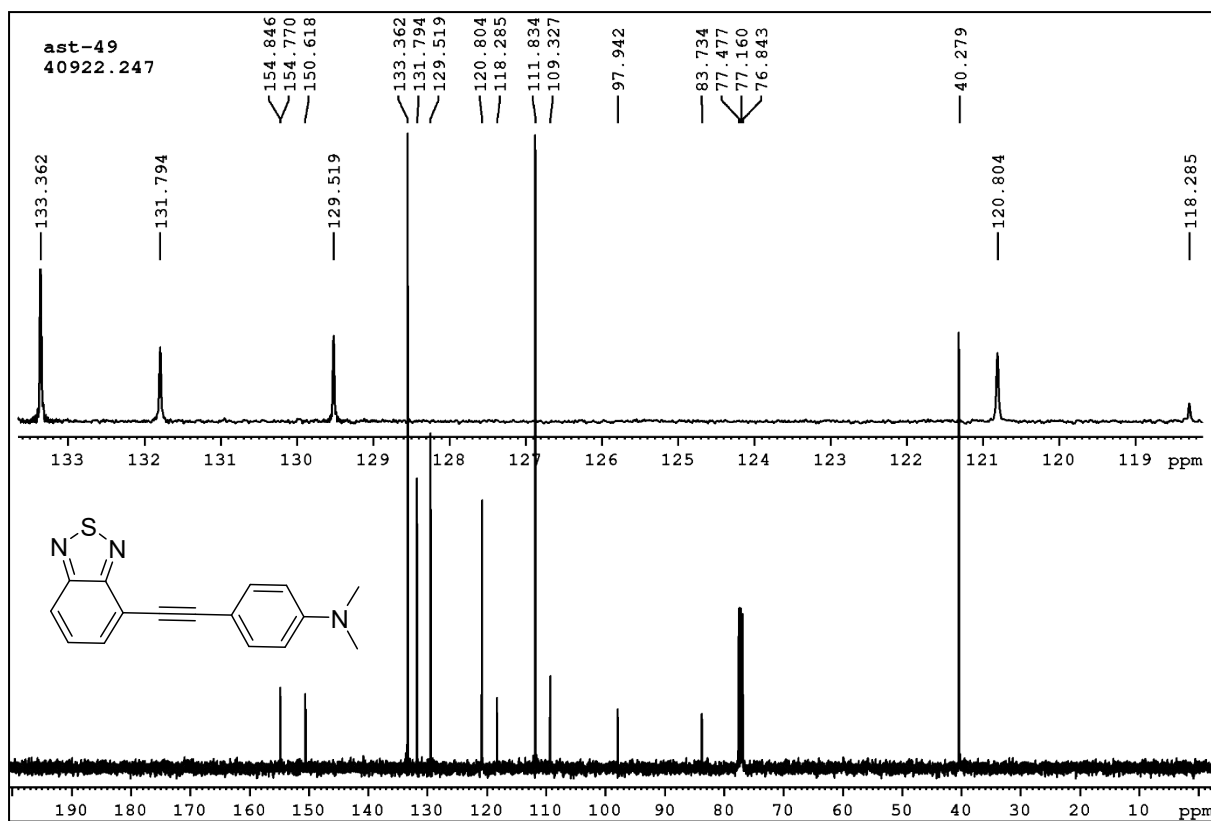

Fig. S18.  $^{13}\text{C}$  NMR spectrum of BTDPPhNMe<sub>2</sub> in CDCl<sub>3</sub>.

Table S1. Different substituents with their Hammett constant values ( $\sigma_p$ ).

| Substituents                                    | Hammett constant value ( $\sigma_p$ ) |
|-------------------------------------------------|---------------------------------------|
| Nitro (-NO <sub>2</sub> )                       | 0.78                                  |
| Cyano(-CN)                                      | 0.66                                  |
| Methoxy carbonyl (-COOMe)                       | 0.45                                  |
| Aldehyde (-CHO)                                 | 0.42                                  |
| Hydrogen (-H)                                   | 0.00                                  |
| Phenyl (-Ph)                                    | -0.01                                 |
| tert. Butyl (- <sup>t</sup> But)                | -0.20                                 |
| Methoxy (-OMe)                                  | -0.27                                 |
| <i>N,N</i> -dimethyl amino (-NMe <sub>2</sub> ) | -0.83                                 |

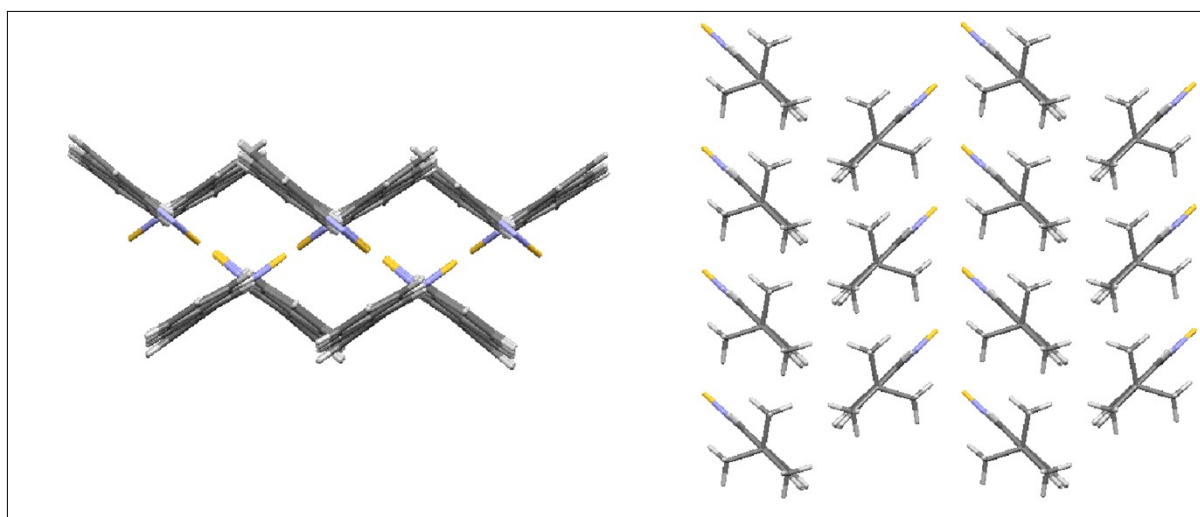

**Fig. S19.** The three-dimensional herringbone packing structure of (a) **BTDPPhPh**, and (b) **BTDPPh'But**, respectively.

**Table S2.** Crystal data and structure refinement for **BTDPPhPh**.

|                                   |                                                  |                |
|-----------------------------------|--------------------------------------------------|----------------|
| Identification code               | 50 (CCDC: 2258215)                               |                |
| Empirical formula                 | C <sub>20</sub> H <sub>12</sub> N <sub>2</sub> S |                |
| Formula weight                    | 312.38                                           |                |
| Temperature                       | 296(2) K                                         |                |
| Wavelength                        | 0.71073 Å                                        |                |
| Crystal system                    | Monoclinic                                       |                |
| Space group                       | P 21/c                                           |                |
| Unit cell dimensions              | a = 11.3392(6) Å                                 | a = 90°.       |
|                                   | b = 5.6836(2) Å                                  | b = 93.381(2)° |
|                                   | c = 24.2274(11) Å                                | g = 90°        |
| Volume                            | 1558.68(12) Å <sup>3</sup>                       |                |
| Z                                 | 4                                                |                |
| Density (calculated)              | 1.331 Mg/m <sup>3</sup>                          |                |
| Absorption coefficient            | 0.208 mm <sup>-1</sup>                           |                |
| F (000)                           | 648                                              |                |
| Crystal size                      | 0.250 x 0.220 x 0.130 mm <sup>3</sup>            |                |
| Theta range for data collection   | 1.684 to 24.999°                                 |                |
| Index ranges                      | -12 ≤ h ≤ 13, -6 ≤ k ≤ 4, -28 ≤ l ≤ 28           |                |
| Reflections collected             | 10153                                            |                |
| Independent reflections           | 2748 [R(int) = 0.0246]                           |                |
| Completeness to theta = 24.999°   | 100.0 %                                          |                |
| Absorption correction             | Semi-empirical from equivalents                  |                |
| Max. and min. transmission        | 0.974 and 0.950                                  |                |
| Refinement method                 | Full-matrix least-squares on F <sup>2</sup>      |                |
| Data / restraints / parameters    | 2748 / 0 / 208                                   |                |
| Goodness-of-fit on F <sup>2</sup> | 1.080                                            |                |

Final R indices [ $I > 2\sigma(I)$ ]

R1 = 0.0498, wR2 = 0.1226

R indices (all data)

R1 = 0.0689, wR2 = 0.1432

Extinction coefficient

n/a

Largest diff. peak and hole

0.210 and -0.358 e.Å<sup>-3</sup>Bond lengths [Å] of **BTDPPhPh**:

|             |          |             |          |
|-------------|----------|-------------|----------|
| C(1)-C(6)   | 1.372(4) | C(12)-C(13) | 1.375(3) |
| C(1)-C(2)   | 1.428(4) | C(12)-C(15) | 1.487(3) |
| C(1)-H(1)   | 0.9300   | C(13)-C(14) | 1.382(3) |
| C(2)-C(3)   | 1.340(5) | C(13)-H(13) | 0.9300   |
| C(2)-H(2)   | 0.9300   | C(14)-H(14) | 0.9300   |
| C(3)-C(4)   | 1.398(4) | C(15)-C(20) | 1.379(3) |
| C(3)-H(3)   | 0.9300   | C(15)-C(16) | 1.380(3) |
| C(4)-N(1)   | 1.351(4) | C(16)-C(17) | 1.389(3) |
| C(4)-C(5)   | 1.431(3) | C(16)-H(16) | 0.9300   |
| C(5)-N(2)   | 1.331(3) | C(17)-C(18) | 1.350(4) |
| C(5)-C(6)   | 1.434(3) | C(17)-H(17) | 0.9300   |
| C(6)-C(7)   | 1.426(3) | C(18)-C(19) | 1.360(4) |
| C(7)-C(8)   | 1.194(3) | C(18)-H(18) | 0.9300   |
| C(8)-C(9)   | 1.435(3) | C(19)-C(20) | 1.384(3) |
| C(9)-C(14)  | 1.369(3) | C(19)-H(19) | 0.9300   |
| C(9)-C(10)  | 1.369(4) | C(20)-H(20) | 0.9300   |
| C(10)-C(11) | 1.375(3) | N(1)-S(1)   | 1.601(3) |
| C(10)-H(10) | 0.9300   |             |          |
| C(11)-C(12) | 1.376(3) |             |          |
| C(11)-H(11) | 0.9300   |             |          |
| N(2)-S(1)   | 1.614(2) |             |          |

Bond angles [°] of **BTDPPhPh**:

|                  |          |                   |          |
|------------------|----------|-------------------|----------|
| C(6)-C(1)-C(2)   | 121.4(3) | C(12)-C(13)-H(13) | 118.7    |
| C(6)-C(1)-H(1)   | 119.3    | C(14)-C(13)-H(13) | 118.7    |
| C(2)-C(1)-H(1)   | 119.3    | C(9)-C(14)-C(13)  | 120.9(2) |
| C(3)-C(2)-C(1)   | 122.4(3) | C(9)-C(14)-H(14)  | 119.6    |
| C(3)-C(2)-H(2)   | 118.8    | C(13)-C(14)-H(14) | 119.6    |
| C(1)-C(2)-H(2)   | 118.8    | C(20)-C(15)-C(16) | 116.7(2) |
| C(2)-C(3)-C(4)   | 118.7(3) | C(20)-C(15)-C(12) | 121.4(2) |
| C(2)-C(3)-H(3)   | 120.6    | C(16)-C(15)-C(12) | 121.9(2) |
| C(4)-C(3)-H(3)   | 120.6    | C(15)-C(16)-C(17) | 121.4(2) |
| N(1)-C(4)-C(3)   | 127.7(2) | C(15)-C(16)-H(16) | 119.3    |
| N(1)-C(4)-C(5)   | 112.0(3) | C(17)-C(16)-H(16) | 119.3    |
| C(3)-C(4)-C(5)   | 120.3(3) | C(18)-C(17)-C(16) | 120.7(2) |
| N(2)-C(5)-C(4)   | 113.8(2) | C(18)-C(17)-H(17) | 119.7    |
| N(2)-C(5)-C(6)   | 125.9(2) | C(16)-C(17)-H(17) | 119.7    |
| C(4)-C(5)-C(6)   | 120.3(2) | C(17)-C(18)-C(19) | 119.0(2) |
| C(1)-C(6)-C(7)   | 123.2(2) | C(17)-C(18)-H(18) | 120.5    |
| C(1)-C(6)-C(5)   | 116.9(2) | C(19)-C(18)-H(18) | 120.5    |
| C(7)-C(6)-C(5)   | 119.9(2) | C(18)-C(19)-C(20) | 120.9(3) |
| C(8)-C(7)-C(6)   | 179.3(3) | C(18)-C(19)-H(19) | 119.6    |
| C(7)-C(8)-C(9)   | 178.2(3) | C(20)-C(19)-H(19) | 119.6    |
| C(14)-C(9)-C(10) | 117.1(2) | C(15)-C(20)-C(19) | 121.3(2) |
| C(14)-C(9)-C(8)  | 120.7(2) | C(15)-C(20)-H(20) | 119.4    |

|                   |          |                   |            |
|-------------------|----------|-------------------|------------|
| C(10)-C(9)-C(8)   | 122.2(2) | C(19)-C(20)-H(20) | 119.4      |
| C(9)-C(10)-C(11)  | 121.7(2) | C(4)-N(1)-S(1)    | 107.00(17) |
| C(9)-C(10)-H(10)  | 119.1    | C(5)-N(2)-S(1)    | 106.44(16) |
| C(11)-C(10)-H(10) | 119.1    | N(1)-S(1)-N(2)    | 100.71(13) |
| C(12)-C(11)-C(10) | 122.1(2) |                   |            |
| C(12)-C(11)-H(11) | 119.0    |                   |            |
| C(10)-C(11)-H(11) | 119.0    |                   |            |
| C(13)-C(12)-C(11) | 115.7(2) |                   |            |
| C(13)-C(12)-C(15) | 122.2(2) |                   |            |
| C(11)-C(12)-C(15) | 122.2(2) |                   |            |
| C(12)-C(13)-C(14) | 122.6(2) |                   |            |

**Table S3.** Crystal data and structure refinement for **BTDPhtBut**.

|                                   |                                                  |                 |
|-----------------------------------|--------------------------------------------------|-----------------|
| Identification code               | 511 (CCDC: 2260324)                              |                 |
| Empirical formula                 | C <sub>18</sub> H <sub>16</sub> N <sub>2</sub> S |                 |
| Formula weight                    | 292.39                                           |                 |
| Temperature                       | 296(2) K                                         |                 |
| Wavelength                        | 0.71073 Å                                        |                 |
| Crystal system                    | Monoclinic                                       |                 |
| Space group                       | P 21/c                                           |                 |
| Unit cell dimensions              | a = 18.867(5) Å                                  | a = 90°.        |
|                                   | b = 10.278(3) Å                                  | b = 92.057(11)° |
|                                   | c = 8.239(2) Å                                   | g = 90°         |
| Volume                            | 1596.6(7) Å <sup>3</sup>                         |                 |
| Z                                 | 4                                                |                 |
| Density (calculated)              | 1.216 Mg/m <sup>3</sup>                          |                 |
| Absorption coefficient            | 0.197 mm <sup>-1</sup>                           |                 |
| F (000)                           | 616                                              |                 |
| Crystal size                      | 0.150 x 0.120 x 0.100 mm <sup>3</sup>            |                 |
| Theta range for data collection   | 2.160 to 24.421°                                 |                 |
| Index ranges                      | -21 ≤ h ≤ 21, -11 ≤ k ≤ 11, -9 ≤ l ≤ 8           |                 |
| Reflections collected             | 10898                                            |                 |
| Completeness to theta = 24.421°   | 98.6 %                                           |                 |
| Absorption correction             | None                                             |                 |
| Refinement method                 | Full-matrix least-squares on F <sup>2</sup>      |                 |
| Data / restraints / parameters    | 10898 / 0 / 226                                  |                 |
| Goodness-of-fit on F <sup>2</sup> | 1.162                                            |                 |
| Final R indices [I > 2σ(I)]       | R1 = 0.1005, wR2 = 0.2729                        |                 |
| R indices (all data)              | R1 = 0.1407, wR2 = 0.2919                        |                 |
| Extinction coefficient            | 0.004(2)                                         |                 |
| Largest diff. peak and hole       | 0.449 and -0.498 e.Å <sup>-3</sup>               |                 |

Bond lengths [Å] of **BTDPhtBut**:

|           |           |             |         |
|-----------|-----------|-------------|---------|
| C(1)-C(6) | 1.384(11) | C(15)-C(18) | 1.54(2) |
| C(1)-C(2) | 1.412(14) | C(15)-C(17) | 1.57(2) |

|              |           |               |          |
|--------------|-----------|---------------|----------|
| C(1)-H(1)    | 0.9300    | C(15)-C(17A)  | 1.57(3)  |
| C(2)-C(3)    | 1.340(14) | C(16)-H(16A)  | 0.9600   |
| C(2)-H(2)    | 0.9300    | C(16)-H(16B)  | 0.9600   |
| C(3)-C(4)    | 1.423(12) | C(16)-H(16C)  | 0.9600   |
| C(3)-H(3)    | 0.9300    | C(17)-H(17A)  | 0.9600   |
| C(4)-N(1)    | 1.332(10) | C(17)-H(17B)  | 0.9600   |
| C(4)-C(5)    | 1.409(12) | C(17)-H(17C)  | 0.9600   |
| C(5)-N(2)    | 1.347(9)  | C(18)-H(18A)  | 0.9600   |
| C(5)-C(6)    | 1.415(11) | C(18)-H(18B)  | 0.9600   |
| C(6)-C(7)    | 1.415(13) | C(18)-H(18C)  | 0.9600   |
| C(7)-C(8)    | 1.190(13) | C(17A)-H(17D) | 0.9600   |
| C(8)-C(9)    | 1.438(13) | C(17A)-H(17E) | 0.9600   |
| C(9)-C(14)   | 1.364(12) | C(17A)-H(17F) | 0.9600   |
| C(9)-C(10)   | 1.393(11) | C(16A)-H(16D) | 0.9600   |
| C(10)-C(11)  | 1.370(13) | C(16A)-H(16E) | 0.9600   |
| C(10)-H(10)  | 0.9300    | C(16A)-H(16F) | 0.9600   |
| C(11)-C(12)  | 1.396(12) | C(18A)-H(18D) | 0.9600   |
| C(11)-H(11)  | 0.9300    | C(18A)-H(18E) | 0.9600   |
| C(12)-C(13)  | 1.378(11) | C(18A)-H(18F) | 0.9600   |
| C(12)-C(15)  | 1.528(13) | N(1)-S(1)     | 1.620(9) |
| C(13)-C(14)  | 1.396(13) | N(2)-S(1)     | 1.598(8) |
| C(13)-H(13)  | 0.9300    |               |          |
| C(14)-H(14)  | 0.9300    |               |          |
| C(15)-C(16A) | 1.46(3)   |               |          |
| C(15)-C(16)  | 1.506(18) |               |          |
| C(15)-C(18A) | 1.52(3)   |               |          |

Bond angle [°] of **BTDPPh<sup>t</sup>But**:

|                   |           |                      |           |
|-------------------|-----------|----------------------|-----------|
| C(6)-C(1)-C(2)    | 122.6(9)  | C(12)-C(15)-C(17A)   | 105.2(14) |
| C(6)-C(1)-H(1)    | 118.7     | C(15)-C(16)-H(16A)   | 109.5     |
| C(2)-C(1)-H(1)    | 118.7     | C(15)-C(16)-H(16B)   | 109.5     |
| C(3)-C(2)-C(1)    | 122.5(9)  | H(16A)-C(16)-H(16B)  | 109.5     |
| C(3)-C(2)-H(2)    | 118.8     | C(15)-C(16)-H(16C)   | 109.5     |
| C(1)-C(2)-H(2)    | 118.8     | H(16A)-C(16)-H(16C)  | 109.5     |
| C(2)-C(3)-C(4)    | 117.7(10) | H(16B)-C(16)-H(16C)  | 109.5     |
| C(2)-C(3)-H(3)    | 121.2     | C(15)-C(17)-H(17A)   | 109.5     |
| C(4)-C(3)-H(3)    | 121.2     | C(15)-C(17)-H(17B)   | 109.5     |
| N(1)-C(4)-C(5)    | 114.4(8)  | H(17A)-C(17)-H(17B)  | 109.5     |
| N(1)-C(4)-C(3)    | 125.8(10) | C(15)-C(17)-H(17C)   | 109.5     |
| C(5)-C(4)-C(3)    | 119.7(9)  | H(17A)-C(17)-H(17C)  | 109.5     |
| N(2)-C(5)-C(4)    | 112.7(8)  | H(17B)-C(17)-H(17C)  | 109.5     |
| N(2)-C(5)-C(6)    | 124.8(8)  | C(15)-C(18)-H(18A)   | 109.5     |
| C(4)-C(5)-C(6)    | 122.5(8)  | C(15)-C(18)-H(18B)   | 109.5     |
| C(1)-C(6)-C(5)    | 115.0(9)  | H(18A)-C(18)-H(18B)  | 109.5     |
| C(1)-C(6)-C(7)    | 122.3(9)  | C(15)-C(18)-H(18C)   | 109.5     |
| C(5)-C(6)-C(7)    | 122.6(7)  | H(18A)-C(18)-H(18C)  | 109.5     |
| C(8)-C(7)-C(6)    | 179.6(11) | H(18B)-C(18)-H(18C)  | 109.5     |
| C(7)-C(8)-C(9)    | 178.8(10) | C(15)-C(17A)-H(17D)  | 109.5     |
| C(14)-C(9)-C(10)  | 117.8(9)  | C(15)-C(17A)-H(17E)  | 109.5     |
| C(14)-C(9)-C(8)   | 122.0(8)  | H(17D)-C(17A)-H(17E) | 109.5     |
| C(10)-C(9)-C(8)   | 120.2(9)  | C(15)-C(17A)-H(17F)  | 109.5     |
| C(11)-C(10)-C(9)  | 121.3(9)  | H(17D)-C(17A)-H(17F) | 109.5     |
| C(11)-C(10)-H(10) | 119.4     | H(17E)-C(17A)-H(17F) | 109.5     |
| C(9)-C(10)-H(10)  | 119.4     | C(15)-C(16A)-H(16D)  | 109.5     |
| C(10)-C(11)-C(12) | 121.5(9)  | C(15)-C(16A)-H(16E)  | 109.5     |
| C(10)-C(11)-H(11) | 119.3     | H(16D)-C(16A)-H(16E) | 109.5     |

|                     |           |                      |          |
|---------------------|-----------|----------------------|----------|
| C(12)-C(11)-H(11)   | 119.3     | C(15)-C(16A)-H(16F)  | 109.5    |
| C(13)-C(12)-C(11)   | 116.8(9)  | H(16D)-C(16A)-H(16F) | 109.5    |
| C(13)-C(12)-C(15)   | 122.0(8)  | H(16E)-C(16A)-H(16F) | 109.5    |
| C(11)-C(12)-C(15)   | 121.2(8)  | C(15)-C(18A)-H(18D)  | 109.5    |
| C(12)-C(13)-C(14)   | 121.6(9)  | C(15)-C(18A)-H(18E)  | 109.5    |
| C(12)-C(13)-H(13)   | 119.2     | H(18D)-C(18A)-H(18E) | 109.5    |
| C(14)-C(13)-H(13)   | 119.2     | C(15)-C(18A)-H(18F)  | 109.5    |
| C(9)-C(14)-C(13)    | 121.0(8)  | H(18D)-C(18A)-H(18F) | 109.5    |
| C(9)-C(14)-H(14)    | 119.5     | H(18E)-C(18A)-H(18F) | 109.5    |
| C(13)-C(14)-H(14)   | 119.5     | C(4)-N(1)-S(1)       | 105.5(7) |
| C(16A)-C(15)-C(18A) | 110(2)    | C(5)-N(2)-S(1)       | 106.5(6) |
| C(16A)-C(15)-C(12)  | 112.3(13) | N(2)-S(1)-N(1)       | 100.8(4) |
| C(16)-C(15)-C(12)   | 111.6(11) |                      |          |
| C(18A)-C(15)-C(12)  | 112.6(15) |                      |          |
| C(16)-C(15)-C(18)   | 108.8(16) |                      |          |
| C(12)-C(15)-C(18)   | 114.1(11) |                      |          |
| C(16)-C(15)-C(17)   | 109.9(15) |                      |          |
| C(12)-C(15)-C(17)   | 106.8(10) |                      |          |
| C(18)-C(15)-C(17)   | 105.4(15) |                      |          |
| C(16A)-C(15)-C(17A) | 109(2)    |                      |          |
| C(18A)-C(15)-C(17A) | 107(2)    |                      |          |

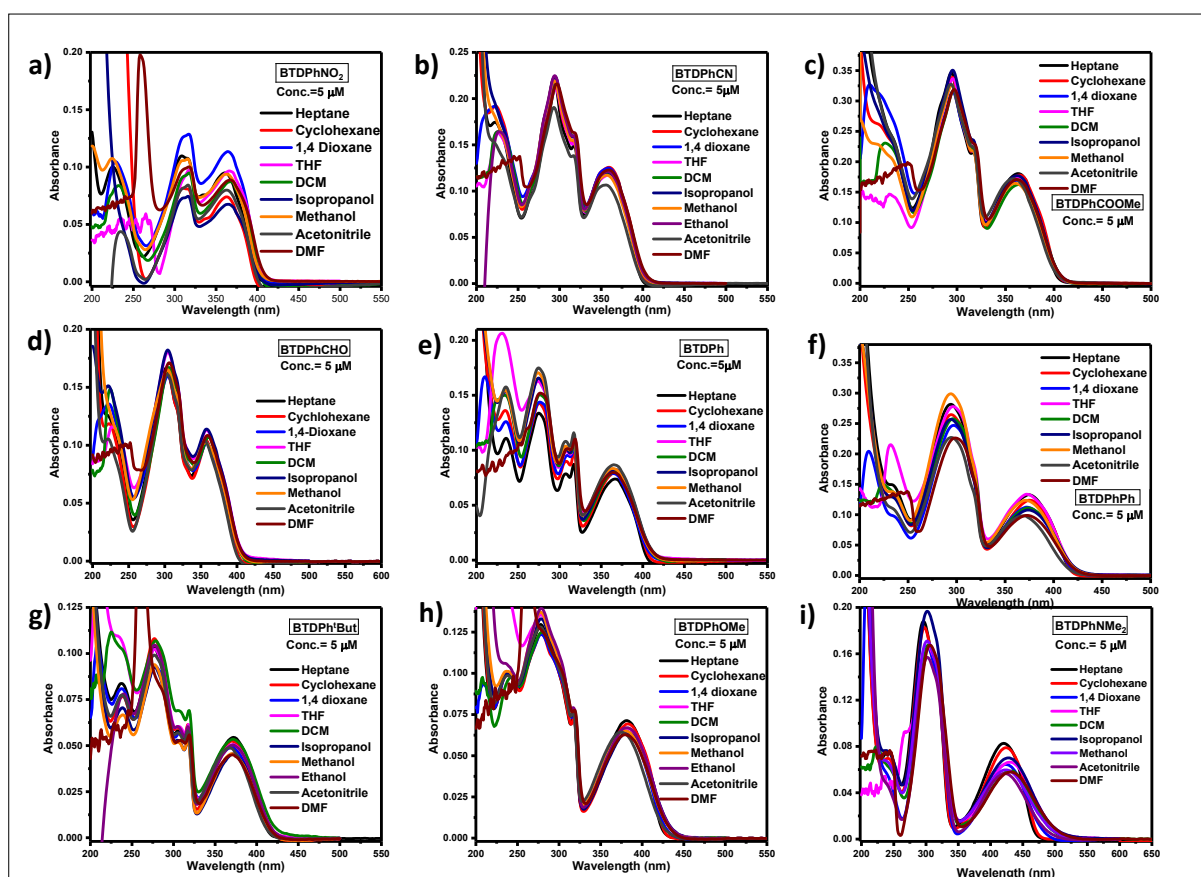

**Fig. S20.** Steady-state absorption spectra of (a) **BTDP** $\text{NO}_2$ , (b) **BTDP** $\text{CN}$ , (c) **BTDP** $\text{COOMe}$ , (d) **BTDP** $\text{CHO}$ , (e) **BTDP** $\text{H}$  and (f) **BTDP** $\text{Ph}$ , (g) **BTDP** $\text{H}^t\text{But}$ , (h) **BTDP** $\text{OMe}$ , (i) **BTDP** $\text{HMe}_2$  in solvents of different polarities. ( $[\text{BTDPs}] = 5 \times 10^{-6} \text{ M}$ )

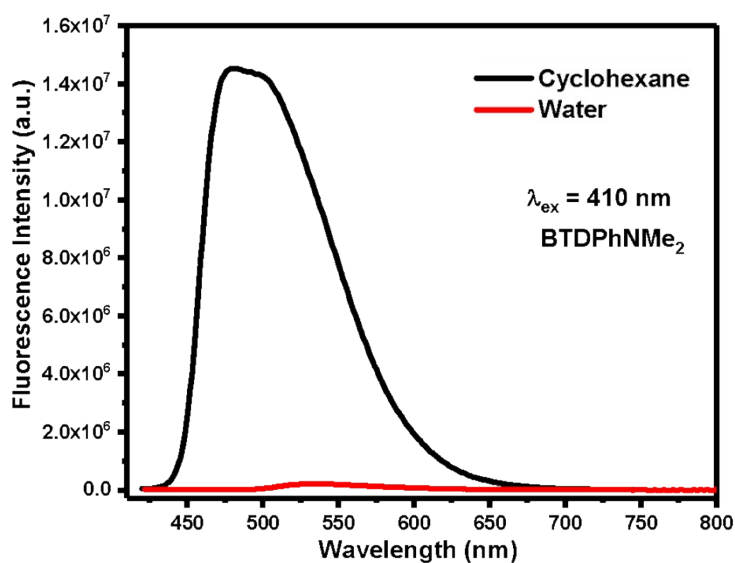

**Fig. S21.** Shows the emission spectra ( $\lambda_{\text{ex}} = 410 \text{ nm}$ ) of **BTDPPhNMe<sub>2</sub>** in cyclohexane and water ( $5 \times 10^{-6} \text{ M}$ ).

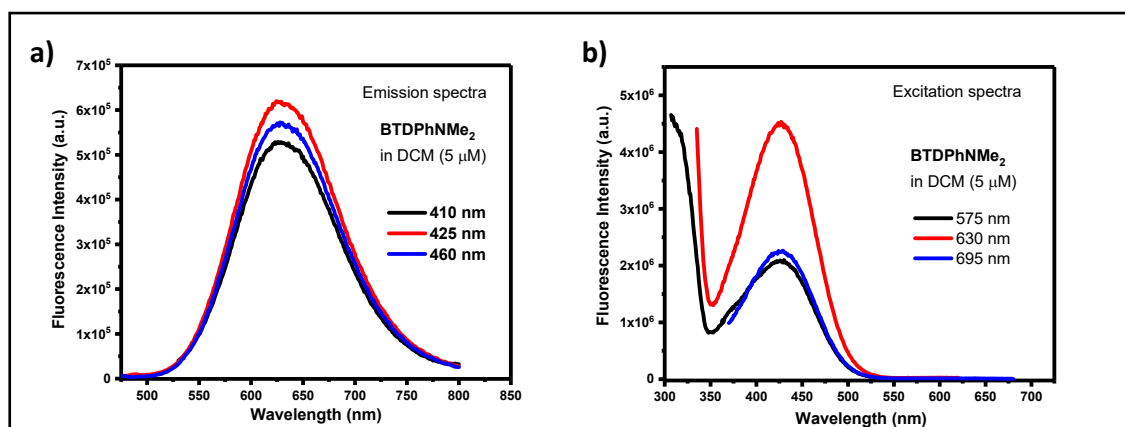

**Fig. S22.** Shows the (a) emission spectra, and (b) excitation spectra of **BTDPPhNMe<sub>2</sub>** in DCM, respectively ( $5 \times 10^{-6} \text{ M}$ ).

**Table S4.** Absorption, emission parameters, Stokes shifts and quantum yields of **BTDPPhNO<sub>2</sub>**, **BTDPPhCN**, and **BTDPPhCOOMe** in solvents of varying polarities ( $(\epsilon-1)/(\epsilon+2)$ ). Where  $\epsilon$  is the dielectric constant of respective solvent medium.

| Solvents    | $\frac{(\epsilon - 1)}{(\epsilon + 2)}$ | BTDPPhNO <sub>2</sub>       |                            |                                  | BTDPPhCN                    |                            |                                  |                   | BTDPPhCOOMe                 |                            |                                  |                   |
|-------------|-----------------------------------------|-----------------------------|----------------------------|----------------------------------|-----------------------------|----------------------------|----------------------------------|-------------------|-----------------------------|----------------------------|----------------------------------|-------------------|
|             |                                         | $\lambda_{\text{abs}}$ (nm) | $\lambda_{\text{em}}$ (nm) | Stokes shift (cm <sup>-1</sup> ) | $\lambda_{\text{abs}}$ (nm) | $\lambda_{\text{em}}$ (nm) | Stokes shift (cm <sup>-1</sup> ) | Q.Y. ( $\Phi_f$ ) | $\lambda_{\text{abs}}$ (nm) | $\lambda_{\text{em}}$ (nm) | Stokes shift (cm <sup>-1</sup> ) | Q.Y. ( $\Phi_f$ ) |
| n-Heptane   | 0.235                                   | 361                         | 425                        | 4171                             | 358                         | 418                        | 4010                             | --                | 364                         | 425                        | 3943                             | --                |
| Cyclohexane | 0.254                                   | 362                         | 425                        | 4095                             | 359                         | 418                        | 3932                             | 0.28              | 365                         | 427                        | 3978                             | 0.28              |
| 1,4-Dioxane | 0.294                                   | 364                         | 427                        | 4053                             | 359                         | 432                        | 4707                             | 0.29              | 362                         | 439                        | 4845                             | 0.37              |
| THF         | 0.687                                   | 366                         | 428                        | 3958                             | 359                         | 434                        | 4814                             | 0.030             | 362                         | 437                        | 4741                             | 0.29              |
| DCM         | 0.726                                   | 368                         | 432                        | 4026                             | 359                         | 438                        | 5024                             | 0.25              | 362                         | 448                        | 5303                             | 0.35              |
| 2-Propanol  | 0.863                                   | 365                         | 441                        | 4722                             | 358                         | 453                        | 5858                             | 0.36              | 364                         | 464                        | 5921                             | 0.49              |



|          |       |     |     |      |     |     |      |      |     |     |      |      |
|----------|-------|-----|-----|------|-----|-----|------|------|-----|-----|------|------|
| Methanol | 0.914 | 364 | 450 | 5250 | 356 | 461 | 6398 | 0.40 | 361 | 471 | 6469 | 0.52 |
| DMF      | 0.922 | 368 | 433 | 4079 | 359 | 445 | 5383 | 0.38 | 362 | 452 | 5500 | 0.43 |
| ACN      | 0.924 | 364 | 440 | 4745 | 356 | 441 | 5414 | 0.31 | 358 | 451 | 5760 | 0.41 |

**Table S5.** Absorption, emission parameters, Stokes shifts and quantum yields of **BTDPhCHO**, **BTDPh** and **BTDPhPh** in solvents of varying polarities ( $(\epsilon-1)/(\epsilon+2)$ ). Where  $\epsilon$  is the dielectric constant of respective solvent medium.

| Solvents    | $\frac{(\epsilon-1)}{(\epsilon+2)}$ | <b>BTDPhCHO</b>             |                            |                                   |                   | <b>BTDPh</b>                |                            |                                   |                   | <b>BTDPhPh</b>              |                            |                                   |                   |
|-------------|-------------------------------------|-----------------------------|----------------------------|-----------------------------------|-------------------|-----------------------------|----------------------------|-----------------------------------|-------------------|-----------------------------|----------------------------|-----------------------------------|-------------------|
|             |                                     | $\lambda_{\text{abs}}$ (nm) | $\lambda_{\text{em}}$ (nm) | Stokes shift ( $\text{cm}^{-1}$ ) | Q.Y. ( $\Phi_f$ ) | $\lambda_{\text{abs}}$ (nm) | $\lambda_{\text{em}}$ (nm) | Stokes shift ( $\text{cm}^{-1}$ ) | Q.Y. ( $\Phi_f$ ) | $\lambda_{\text{abs}}$ (nm) | $\lambda_{\text{em}}$ (nm) | Stokes shift ( $\text{cm}^{-1}$ ) | Q.Y. ( $\Phi_f$ ) |
| n-Heptane   | 0.235                               | 356                         | 423                        | 4449                              | --                | 367                         | 428                        | 3883                              | --                | 374                         | 438                        | 3907                              | --                |
| Cyclohexane | 0.254                               | 358                         | 425                        | 4404                              | 0.08              | 368                         | 428                        | 3809                              | 0.40              | 375                         | 440                        | 3939                              | 0.43              |
| 1,4-Dioxane | 0.294                               | 358                         | 437                        | 5050                              | 0.13              | 364                         | 445                        | 5001                              | 0.74              | 374                         | 462                        | 5093                              | 0.49              |
| THF         | 0.687                               | 358                         | 437                        | 5050                              | 0.14              | 365                         | 449                        | 5126                              | 0.66              | 375                         | 483                        | 5963                              | 0.46              |
| DCM         | 0.726                               | 361                         | 442                        | 5076                              | 0.20              | 368                         | 457                        | 5292                              | 0.82              | 374                         | 476                        | 5730                              | 0.64              |
| 2-Propanol  | 0.863                               | 358                         | 461                        | 6241                              | 0.22              | 367                         | 477                        | 6284                              | 0.81              | 373                         | 492                        | 6484                              | 0.56              |
| Methanol    | 0.914                               | 356                         | 472                        | 6903                              | 0.29              | 364                         | 485                        | 6854                              | 0.44              | 373                         | 520                        | 7579                              | 0.27              |
| DMF         | 0.922                               | 359                         | 450                        | 5633                              | 0.23              | 361                         | 464                        | 6149                              | 0.71              | 373                         | 502                        | 6889                              | 0.57              |
| ACN         | 0.924                               | 355                         | 448                        | 5848                              | 0.28              | 365                         | 463                        | 5799                              | 0.67              | 368                         | 491                        | 6807                              | 0.64              |

**Table S6.** Absorption, emission parameters, Stokes shifts and quantum yields of **BTDPh<sup>t</sup>But**, **BTDPhOMe** and **BTDPhNMe<sub>2</sub>** in solvents of varying polarities ( $(\epsilon-1)/(\epsilon+2)$ ). Where  $\epsilon$  is the dielectric constant of respective solvent medium.

| Solvents    | $\frac{(\epsilon-1)}{(\epsilon+2)}$ | <b>BTDPh<sup>t</sup>But</b> |                            |                                   |                   | <b>BTDPhOMe</b>             |                            |                                   |                   | <b>BTDPhNMe<sub>2</sub></b> |                            |                                   |                   |
|-------------|-------------------------------------|-----------------------------|----------------------------|-----------------------------------|-------------------|-----------------------------|----------------------------|-----------------------------------|-------------------|-----------------------------|----------------------------|-----------------------------------|-------------------|
|             |                                     | $\lambda_{\text{abs}}$ (nm) | $\lambda_{\text{em}}$ (nm) | Stokes shift ( $\text{cm}^{-1}$ ) | Q.Y. ( $\Phi_f$ ) | $\lambda_{\text{abs}}$ (nm) | $\lambda_{\text{em}}$ (nm) | Stokes shift ( $\text{cm}^{-1}$ ) | Q.Y. ( $\Phi_f$ ) | $\lambda_{\text{abs}}$ (nm) | $\lambda_{\text{em}}$ (nm) | Stokes shift ( $\text{cm}^{-1}$ ) | Q.Y. ( $\Phi_f$ ) |
| n-Heptane   | 0.235                               | 374                         | 435                        | 3749                              | --                | 381                         | 448                        | 3925                              | --                | 420                         | 478                        | 2889                              | --                |
| Cyclohexane | 0.254                               | 373                         | 433                        | 3715                              | 0.56              | 382                         | 449                        | 3906                              | 0.87              | 423                         | 478                        | 2720                              | 0.66              |
| 1,4-Dioxane | 0.294                               | 370                         | 456                        | 5097                              | 0.80              | 378                         | 476                        | 5447                              | 0.80              | 423                         | 578                        | 6340                              | 0.24              |
| THF         | 0.687                               | 372                         | 472                        | 5695                              | 0.77              | 383                         | 491                        | 5743                              | 0.79              | 430                         | 616                        | 7022                              | < 0.05            |
| DCM         | 0.726                               | 371                         | 470                        | 5678                              | 0.88              | 379                         | 504                        | 6544                              | 0.69              | 428                         | 628                        | 7441                              | < 0.05            |
| 2-Propanol  | 0.863                               | 373                         | 492                        | 6484                              | 0.67              | 379                         | 540                        | 7867                              | 0.18              | 427                         | 566                        | 5751                              | --                |
| Methanol    | 0.914                               | 371                         | 505                        | 7152                              | 0.56              | 378                         | 555                        | 8437                              | 0.23              | 423                         | 527                        | 4665                              | --                |
| DMF         | 0.922                               | 374                         | 481                        | 5948                              | 0.90              | 380                         | 536                        | 7659                              | 0.32              | 431                         | --                         | --                                | --                |
| ACN         | 0.924                               | 366                         | 478                        | 6402                              | 0.84              | 375                         | 525                        | 7619                              | 0.60              | 421                         | --                         | --                                | --                |

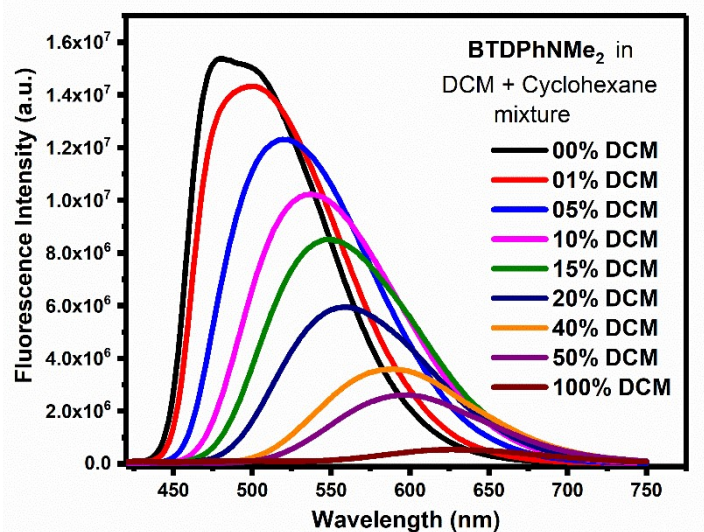

**Fig. S23.** Fluorescence emission spectra ( $\lambda_{\text{ex}} = 410 \text{ nm}$ ) of **BTDPPhNMe<sub>2</sub>** in different fraction of DCM in cyclohexane solution ( $5 \times 10^{-6} \text{ M}$ ).

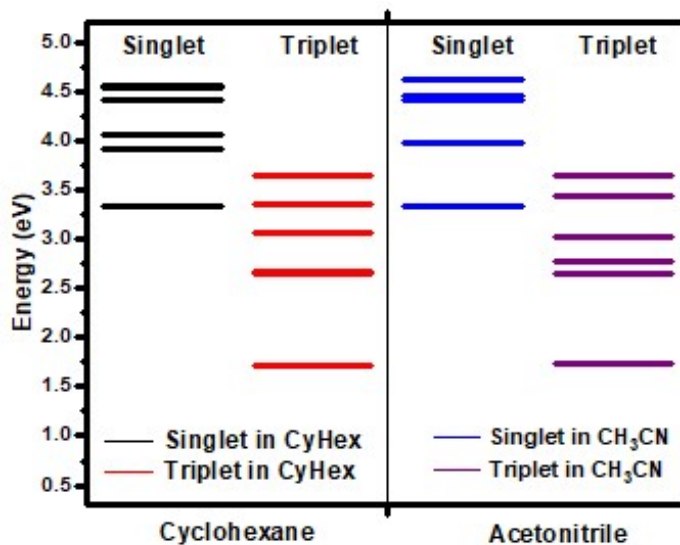

**Fig. S24.** Shows the computationally calculated singlet triplet energy levels of **BTDPPhNO<sub>2</sub>** in cyclohexane and acetonitrile solvents.

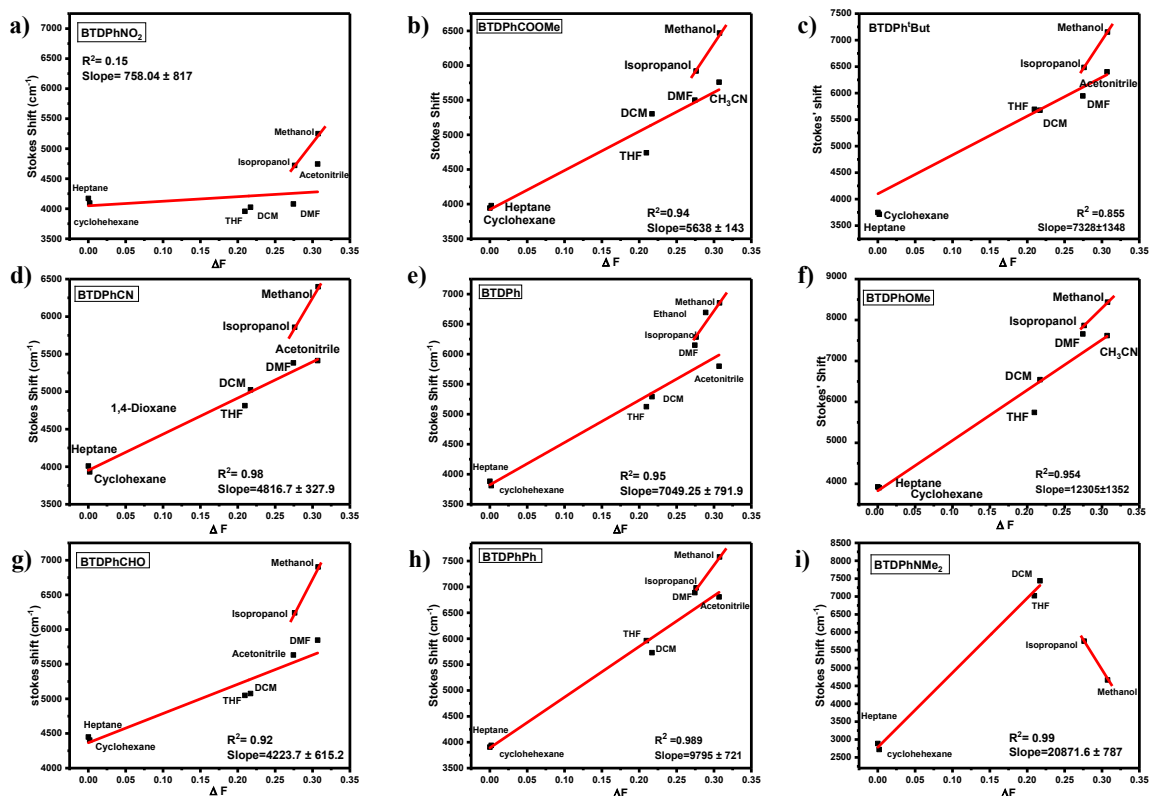

**Fig. S25.** Lippert mataga plot of (a) BTDPPhNO<sub>2</sub> (b) BTDPPhCN, (c) BTDPPhCOOMe, (d) BTDPPhCHO, (e) BTDPPh, (f) BTDPPhPh, (g) BTDPPh<sup>t</sup>But, (h) BTDPPhOMe, and (i) BTDPPhNMe<sub>2</sub> in different solvents.

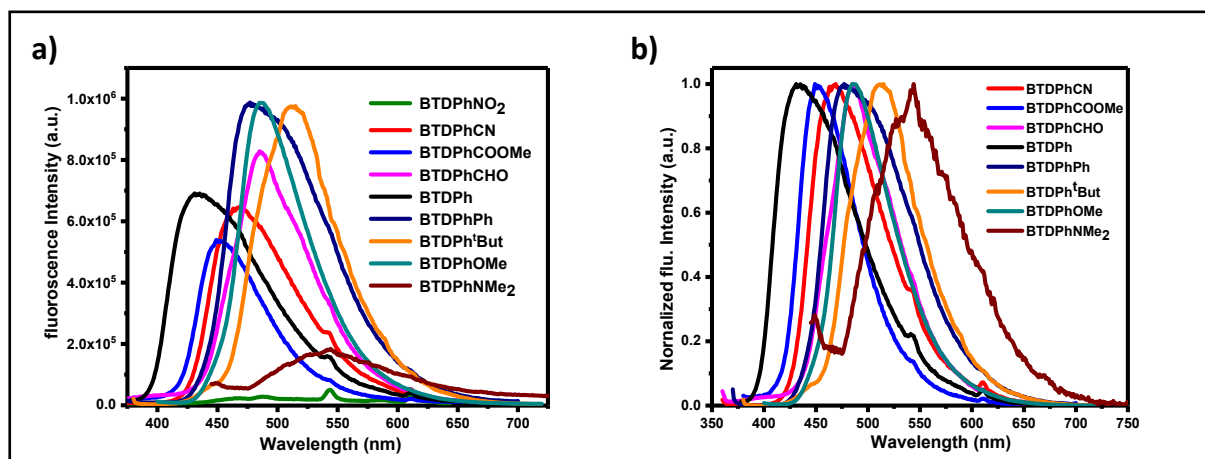

**Fig. S26.** (a) Solid state emission spectra of BTDP derivatives, and (b) Normalized solid state emission spectra of BTDP derivatives. ( $\lambda_{\text{ex}}$  at their respective absorption maximum wavelength in cyclohexane solvent).

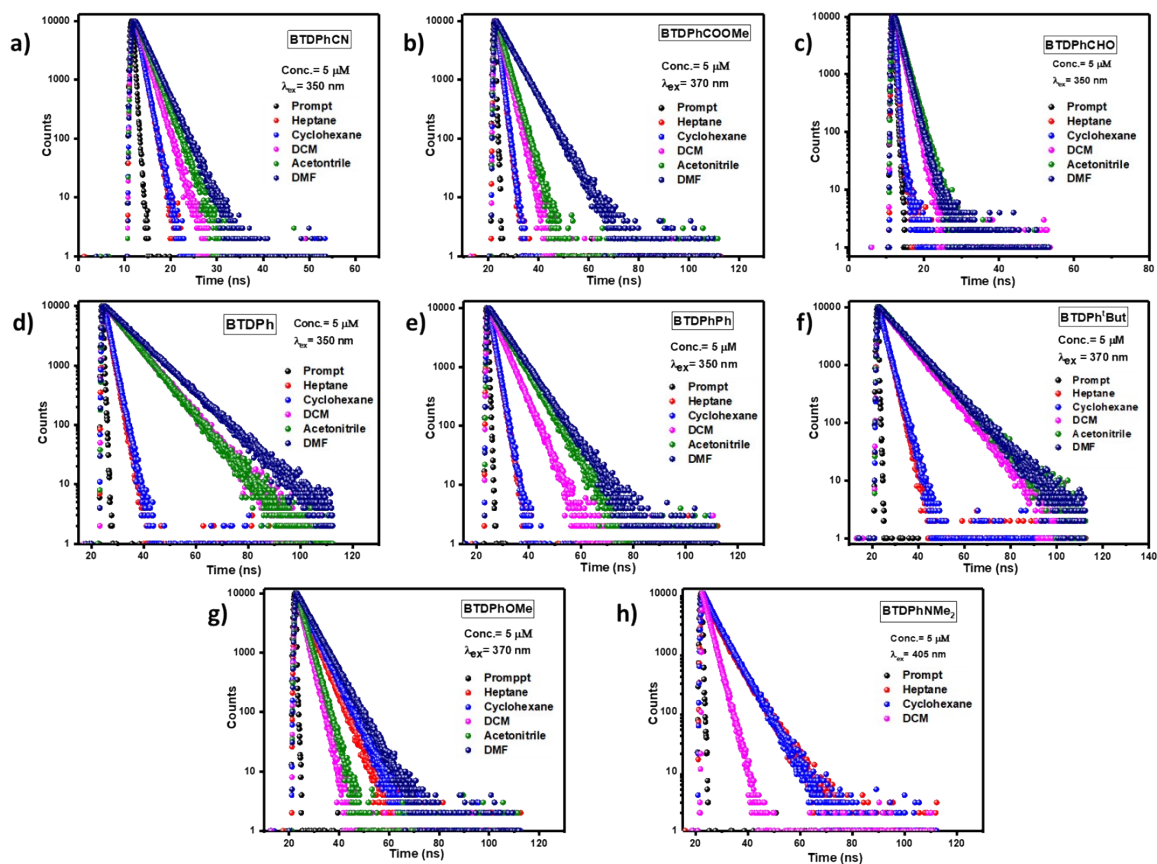

**Fig. S27.** Fluorescence decay profiles of (a) **BTDPPhCN** ( $\lambda_{\text{ex}} = 350 \text{ nm}$ ), (b) **BTDPPhCOOMe** ( $\lambda_{\text{ex}} = 370 \text{ nm}$ ), (c) **BTDPPhCHO** ( $\lambda_{\text{ex}} = 350 \text{ nm}$ ), (d) **BTDPPh** ( $\lambda_{\text{ex}} = 350 \text{ nm}$ ), (e) **BTDPPhPh** ( $\lambda_{\text{ex}} = 350 \text{ nm}$ ), (f) **BTDPPh'But** ( $\lambda_{\text{ex}} = 370 \text{ nm}$ ), (g) **BTDPPhOMe** ( $\lambda_{\text{ex}} = 370 \text{ nm}$ ), and (h) **BTDPPhNMe<sub>2</sub>** ( $\lambda_{\text{ex}} = 405 \text{ nm}$ ) in solvents of different polarities. ( $[\text{BTDs}] = 5 \times 10^{-6} \text{ M}$ )

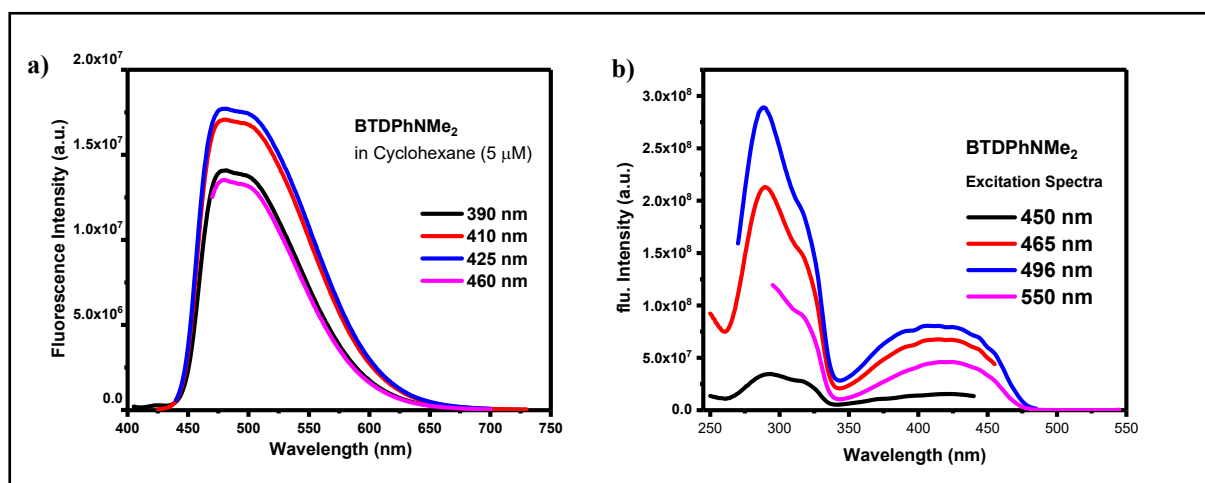

**Fig. S28.** Shows the (a) the emission spectra, and (b) excitation spectra of **BTDPPhNMe<sub>2</sub>** in cyclohexane, respectively ( $5 \times 10^{-6} \text{ M}$ ).

**Table S7.** Fluorescence decay data of **BTDPPhNMe<sub>2</sub>** in cyclohexane of at different  $\lambda_{\text{ex}}$  and  $\lambda_{\text{em}}$ .

|                                        | $\lambda_{\text{em}} = 465 \text{ nm}$          |                                                 |          | $\lambda_{\text{em}} = 496 \text{ nm}$          |                                                 |          | $\lambda_{\text{em}} = 555 \text{ nm}$          |                                                 |          |
|----------------------------------------|-------------------------------------------------|-------------------------------------------------|----------|-------------------------------------------------|-------------------------------------------------|----------|-------------------------------------------------|-------------------------------------------------|----------|
|                                        | $\tau_1(\text{ns})$<br>( $\alpha$ ) ( $\beta$ ) | $\tau_2(\text{ns})$<br>( $\alpha$ ) ( $\beta$ ) | $\chi^2$ | $\tau_1(\text{ns})$<br>( $\alpha$ ) ( $\beta$ ) | $\tau_2(\text{ns})$<br>( $\alpha$ ) ( $\beta$ ) | $\chi^2$ | $\tau_1(\text{ns})$<br>( $\alpha$ ) ( $\beta$ ) | $\tau_2(\text{ns})$<br>( $\alpha$ ) ( $\beta$ ) | $\chi^2$ |
| $\lambda_{\text{ex}} = 405 \text{ nm}$ | 3.01<br>(44) (28)                               | 5.98<br>(56) (72)                               | 1.27     | 3.14<br>(35) (21)                               | 6.08<br>(65) (79)                               | 1.24     | 6.20<br>(100) (100)                             | --                                              | 1.09     |
| $\lambda_{\text{ex}} = 450 \text{ nm}$ | 3.19<br>(49) (34)                               | 6.07<br>(51) (66)                               | 1.26     | 3.01<br>(35) (21)                               | 6.05<br>(65) (79)                               | 1.23     | 6.20<br>(100) (100)                             | --                                              | 1.28     |

<sup>a</sup> $\alpha$  is the population of the emitting species, and <sup>b</sup> $\beta$  is the contribution of each emitting species towards the total emission.

**Table S8.** Represents the experimental maximum absorption wavelength ( $\lambda_{\text{max}}$ , nm) and theoretically [CAM-B3LYP/6-311+g(d,p)] calculated  $\lambda_{\text{max}}$ , (in nm), in cyclohexane and acetonitrile of the compounds. .  $f$  is the oscillator strength value for the transition  $S_0 \rightarrow S_1$ .

| Compound                      | Solvent            | Energy of Transition (eV) | $\lambda_{\text{max}}$ (theoretical) (nm) | $\lambda_{\text{max}}$ (experimental) (nm) | Oscillator strength ( $f$ ) | Main Electronic Transitions [weight%]                       |
|-------------------------------|--------------------|---------------------------|-------------------------------------------|--------------------------------------------|-----------------------------|-------------------------------------------------------------|
| <b>BTDPPhNO<sub>2</sub></b>   | Cyclohexane        | 3.3396                    | 371                                       | 362                                        | 0.8758                      | HOMO→LUMO (89%)<br>HOMO→LUMO+1 (05%)<br>HOMO-2→LUMO+1 (03%) |
|                               | CH <sub>3</sub> CN | 3.3296                    | 372                                       | <u>364</u>                                 | 0.9084                      | HOMO→LUMO (84%)<br>HOMO→LUMO+1 (03%)<br>HOMO-2→LUMO+1 (09%) |
| <b>BTDPPhCN</b>               | Cyclohexane        | 3.3727                    | 368                                       | 359                                        | 0.7423                      | HOMO→LUMO (94%)                                             |
|                               | CH <sub>3</sub> CN | 3.3914                    | 365                                       | 356                                        | 0.7134                      | HOMO→LUMO (94%)                                             |
| <b>BTDPPhCO<sub>2</sub>Me</b> | Cyclohexane        | 3.3441                    | 371                                       | 365                                        | 0.7117                      | HOMO→LUMO (94%)                                             |
|                               | CH <sub>3</sub> CN | 3.3741                    | 358                                       | 358                                        | 0.6867                      | HOMO→LUMO (94%)                                             |
| <b>BTDPPhCHO</b>              | Cyclohexane        | 3.3367                    | 372                                       | 358                                        | 0.7872                      | HOMO→LUMO (94%)                                             |
|                               | CH <sub>3</sub> CN | 3.3571                    | 369                                       | 355                                        | 0.7680                      | HOMO→LUMO (94%)                                             |
| <b>BTDPPh</b>                 | Cyclohexane        | 3.3276                    | 373                                       | 368                                        | 0.5221                      | HOMO→LUMO (94%)<br>HOMO-2→LUMO (03%)                        |
|                               | CH <sub>3</sub> CN | 3.3573                    | 369                                       | 365                                        | 0.4899                      | HOMO→LUMO (94%)<br>HOMO-2→LUMO (2.7%)                       |
| <b>BTDPPhPh</b>               | Cyclohexane        | 3.2498                    | 381                                       | 375                                        | 0.7586                      | HOMO→LUMO (88%)<br>HOMO-1→LUMO (09%)                        |
|                               | CH <sub>3</sub> CN | 3.2799                    | 368                                       | 368                                        | 0.7331                      | HOMO→LUMO (87%)<br>HOMO-1→LUMO (09%)                        |
| <b>BTDPPh<sup>t</sup>But</b>  | Cyclohexane        | 3.2732                    | 379                                       | 373                                        | 0.5801                      | HOMO→LUMO (93%)<br>HOMO-2→LUMO (04%)                        |
|                               | CH <sub>3</sub> CN | 3.3041                    | 375                                       | 366                                        | 0.5502                      | HOMO→LUMO (93%)<br>HOMO-2→LUMO (4%)                         |

|                             |                    |        |     |     |        |                                      |
|-----------------------------|--------------------|--------|-----|-----|--------|--------------------------------------|
| <b>BTDPHOMe</b>             | Cyclohexane        | 3.1961 | 388 | 382 | 0.5679 | HOMO→LUMO (91%)<br>HOMO-1→LUMO (07%) |
|                             | CH <sub>3</sub> CN | 3.2243 | 376 | 375 | 0.5401 | HOMO→LUMO (90%)<br>HOMO-1→LUMO (07%) |
| <b>BTDPHNM<sub>e2</sub></b> | Cyclohexane        | 2.9654 | 418 | 423 | 0.6633 | HOMO→LUMO (86%)<br>HOMO-1→LUMO (11%) |
|                             | CH <sub>3</sub> CN | 2.9448 | 421 | 421 | 0.6379 | HOMO→LUMO (86%)<br>HOMO-1→LUMO (11%) |

**Table S9.** Theoretically calculated parameters and experimentally observed Lippert-Mataga slope, change in dipole moment ( $\Delta\mu$ ), and fluorescence emission shift from cyclohexane to acetonile ( $\Delta\lambda_{em}$ ) of the **BTDS**.

| Compound                               | BTDPHNO <sub>2</sub> | BTDPHCN | BTDPHCOOMe | BTDPHsCHO | BTDPH  | BTDPHPh | BTDPH'But | BTDPHOMe | BTDPHNMe <sub>2</sub> |
|----------------------------------------|----------------------|---------|------------|-----------|--------|---------|-----------|----------|-----------------------|
| Lippert-Mataga Slope                   | --                   | 4816.7  | 5638.0     | 4223.7    | 7049.2 | 9795.0  | 7328.0    | 12305.0  | 20871.6               |
| $\Delta\mu$ (D)                        | --                   | 12.10   | 15.01      | 10.50     | 12.00  | 22.82   | 16.13     | 20.53    | 26.97                 |
| $\Delta\lambda_{em}$ <sup>a</sup> (nm) | 15                   | 23      | 24         | 23        | 35     | 51      | 45        | 76       | 150 <sup>b</sup>      |
| $q_{CT}$ (a.u.)                        | 0.555                | 0.521   | 0.553      | 0.485     | 0.637  | 0.698   | 0.693     | 0.740    | 0.861                 |
| $d_{CT}$ (Å°)                          | 3.968                | 3.165   | 3.292      | 2.484     | 3.753  | 4.879   | 4.004     | 4.562    | 5.341                 |
| $t_{index}$ (Å)                        | 0.306                | 0.326   | 0.378      | -0.339    | 01.010 | 01.346  | 0.867     | 1.346    | 1.884                 |

<sup>a</sup> change in  $\lambda_{em}$  maxima from cyclohexane to acetonitrile. <sup>b</sup> change in  $\lambda_{em}$  maxima from cyclohexane to DCM

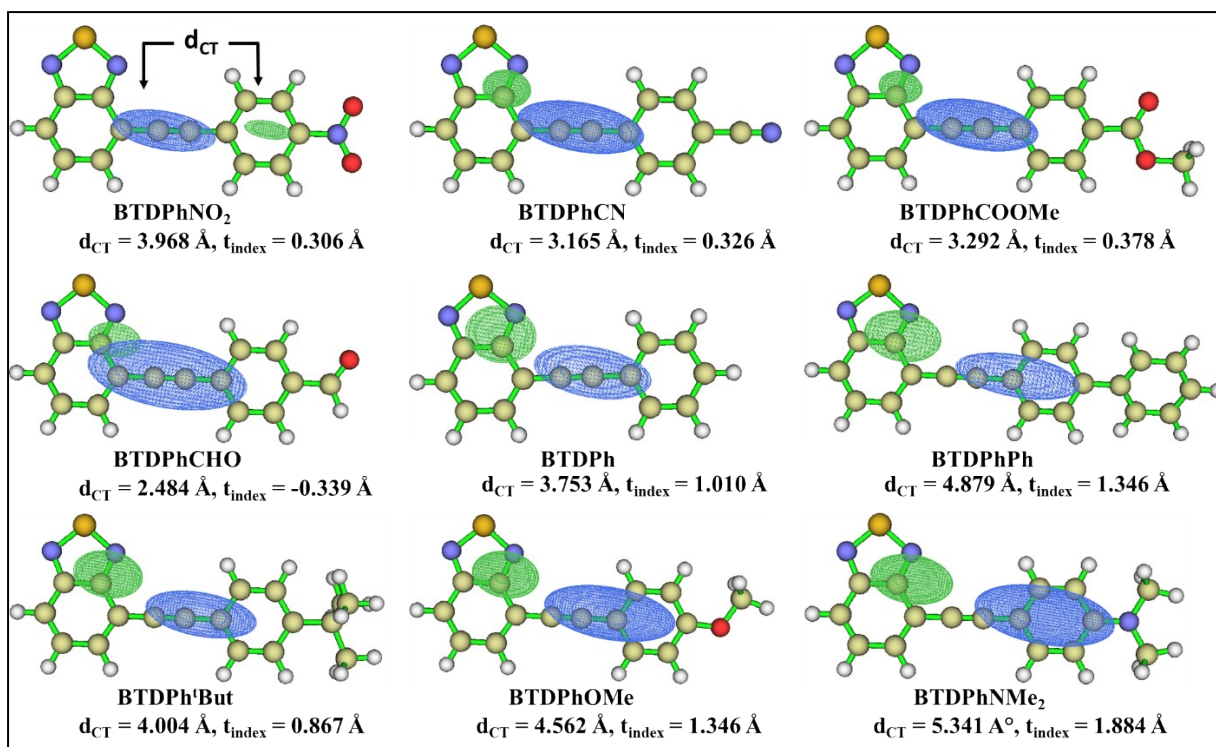

**Fig. S29.** Plots of positive and negative parts of  $\Delta\rho(r)$ . Green and blue regions indicate the positive ( $\rho^+$ ) and negative ( $\rho^-$ ) region of  $\Delta\rho$  respectively. Different iso-surface values are adjusted so as just to visualize both the regions.

**Table S10.** Electrochemical properties of the compounds recorded in acetonitrile.

| Compound                 | $E_{onset}$ (ox) (V) | $E_{onset}$ (red) (V) | $E_{HOMO}^a$ (eV) | $E_{LUMO}^b$ (eV) | $E_g^{CVc}$ (eV) | $E_g^{optd}$ |
|--------------------------|----------------------|-----------------------|-------------------|-------------------|------------------|--------------|
| BTDPPhNO <sub>2</sub>    | 1.80                 | -0.84                 | -6.26             | -3.46             | 2.80             | 3.02         |
| BTDPPhCN                 | 1.53                 | -1.52                 | -5.99             | -2.78             | 3.21             | 3.06         |
| BTDPPhCO <sub>2</sub> Me | 1.83                 | -1.14                 | -6.29             | -3.16             | 3.13             | 3.06         |
| BTDPPhCHO                | 1.64                 | -1.36                 | -6.10             | -2.94             | 3.16             | 3.05         |
| BTDPPh                   | 1.33                 | -1.61                 | -5.79             | -2.69             | 3.10             | 3.02         |
| BTDPPhPh                 | 1.22                 | -1.54                 | -5.68             | -2.76             | 2.92             | 2.95         |
| BTDPPh <sup>t</sup> But  | 1.21                 | -1.72                 | -5.67             | -2.58             | 3.09             | 2.94         |
| BTDPPhOMe                | 1.08                 | -1.60                 | -5.54             | -2.70             | 2.84             | 2.85         |
| BTDPPhNMe <sub>2</sub>   | 0.42                 | -1.62                 | -4.88             | -2.68             | 2.20             | 2.43         |

The first oxidation and reduction of the cyclic voltammograms were considered for the calculations.  $E_g$  is the energy gap between HOMO and LUMO and  $\lambda_{onset}$  is the onset of the UV-visible absorption spectra (here taken in acetonitrile).  $^a E_{HOMO} = -[E_{onset}(\text{oxidation}) + 4.8 - E_{FC}]$  eV;  $^b E_{LUMO} = -[E_{onset}(\text{reduction}) + 4.8 - E_{FC}]$  eV;  $^c E_g^{CV} = E_{LUMO} - E_{HOMO}$ ;  $^d E_g^{opt} = (1240/\lambda_{onset})$  eV

Equation S8. 
$$E_{HOMO} = -[E_{onset}(\text{oxidation}) + 4.8 - E_{FC}] \text{ eV}$$

Equation S9.  $E_{\text{LUMO}} = - [E_{\text{onset}}(\text{reduction}) + 4.8 - E_{\text{FC}}] \text{ eV}$

Equation S10.  $E_{\text{g}}^{\text{CV}} = E_{\text{LUMO}} - E_{\text{HOMO}}; E_{\text{g}}^{\text{opt}} = (1240/\lambda_{\text{onset}}) \text{ eV}$

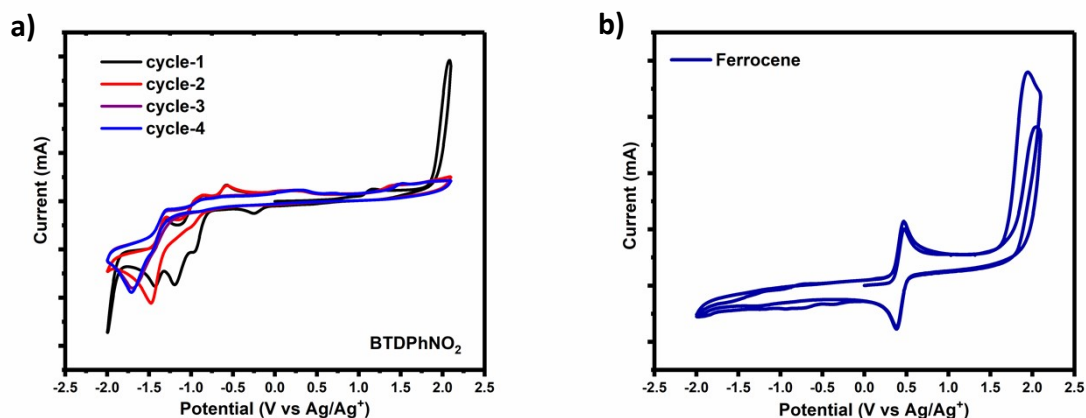

**Fig. S30.** (a) Cyclic voltammogram of **BTDPPhNO<sub>2</sub>** for four consecutive cycles in acetonitrile showing its electrochemical instability and (b) Cyclic voltammogram of ferrocene in acetonitrile.

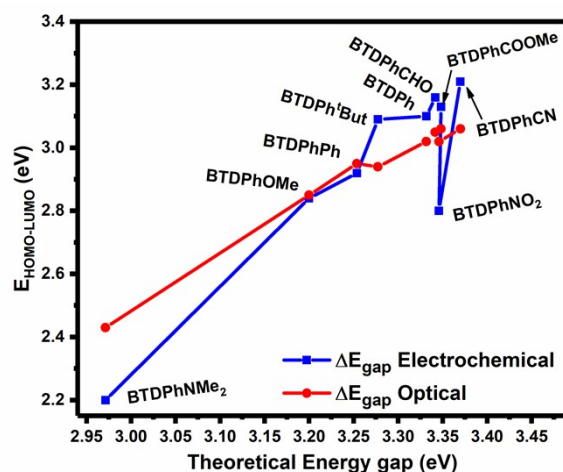

**Fig. S31.** Comparison of optical and electrochemical energy gap (HOMO-LUMO gap) with respect to the theoretical ones.

**Table S11.** Calculated transition dipole moment vectors of the compounds (arrows show their directions and their respective magnitudes are written down) for  $S_0 \rightarrow S_1$  (absorption),  $S_1 \rightarrow S_0$  (emission), and  $S_0 \rightarrow S_2$  (absorption) in cyclohexane using CAM-B3LYP/6-311+g(d,p) level of theory.

| Compound | Directions of Transition Dipole Moment Vectors and their Magnitudes in Debye (D) |                       |                       |
|----------|----------------------------------------------------------------------------------|-----------------------|-----------------------|
|          | $S_0 \rightarrow S_1$                                                            | $S_1 \rightarrow S_0$ | $S_0 \rightarrow S_2$ |
|          |                                                                                  |                       |                       |



|                      |                                                                                               |                                                                                                |                                                                                                 |
|----------------------|-----------------------------------------------------------------------------------------------|------------------------------------------------------------------------------------------------|-------------------------------------------------------------------------------------------------|
| BTDPHNO <sub>2</sub> | 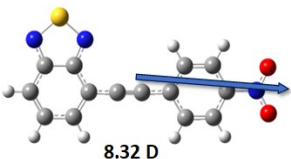<br>8.32 D   | <br>8.67 D   | <br>0.00     |
| BTDPHCN              | <br>7.62 D   | <br>7.70 D   | <br>5.42 D   |
| BTDPHCOOMe           | <br>7.49 D   | <br>7.52 D   | <br>5.59 D   |
| BTDPHCHO             | <br>7.89 D  | <br>7.93 D  | <br>0.10 D  |
| BTDPH                | <br>6.43 D | <br>6.83 D | <br>4.34 D |
| BTDPHPh              | <br>7.84 D | <br>8.13 D | <br>6.75 D |
| BTDPHBut             | <br>6.84 D | <br>6.84 D | <br>4.54 D |
| BTDPHOMe             | <br>6.84 D | <br>6.78 D | <br>4.66 D |

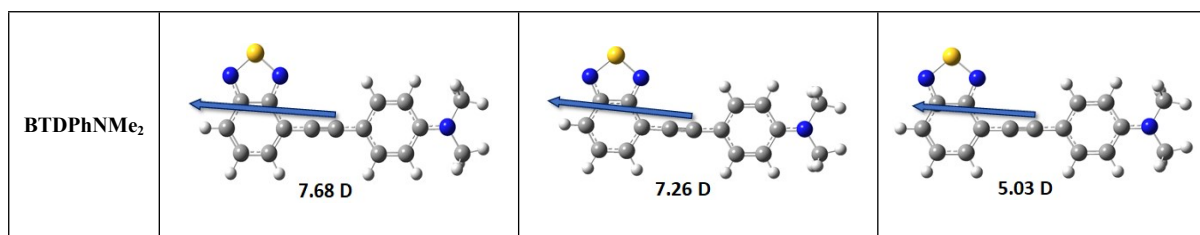

The rotational correlation time ( $\theta$ ) of the fluorophore is given by the following equation.

Equation S11:<sup>6</sup>

$$\theta = \frac{\eta V}{RT}$$

where  $\eta$  is the viscosity, T is the temperature in K, R is the gas constant, and V is the volume of the rotating unit.

## References

1. J. G. Calvert, *Pure Appl. Chem.*, 1990, **62**, 2167–2219
2. J. R. Lakowicz, in *Principles of Fluorescence Spectroscopy*, Springer, Third Edit., 2006, p. 192.
3. SADABS, Version 2012/1; Bruker, Bruker AXS Inc.: Madison, Wisconsin, USA, 2012
4. T. Le Bahers, C. Adamo and I. Ciofini, *J. Chem. Theory Comput.*, 2011, **7**, 2498–2506.
5. J. R. Lakowicz, in *Principles of Fluorescence Spectroscopy*, Springer, Third Edit., 2006, p. 363.
6. J. R. Lakowicz, in *Principles of Fluorescence Spectroscopy*, Springer, Third Edit., 2006, p. 367.
